# Supplementary material
Source: ML conference proceedings conference paper supplement (https://openreview.net/forum?id=iD18l6prA7)
Supplement: supplementary_material [file attachment]

After mapping

|   |      |      |      |      |      |
|---|------|------|------|------|------|
| a | 1    | 0.32 | 0.3  | 0.32 | 0.32 |
| b | 0.12 | 1    | 0.31 | 0.32 | 0.31 |
| c | 0.11 | 0.12 | 1    | 0.31 | 0.32 |
| d | 0.12 | 0.12 | 0.12 | 1    | 0.31 |
| e | 0.11 | 0.12 | 0.12 | 0.12 | 1    |

Model Symbol

Before mapping
