# Supplementary material
Source: ML conference proceedings conference paper supplement (https://openreview.net/forum?id=iD18l6prA7)

Cosine similarity

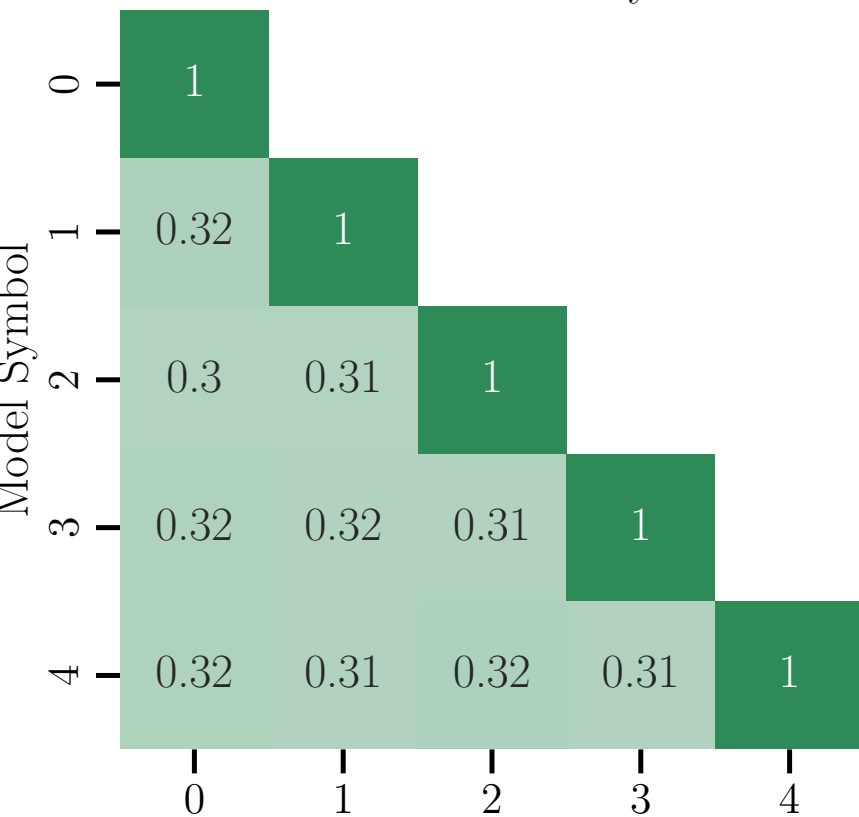

Supplement: supplementary_material [file attachment]

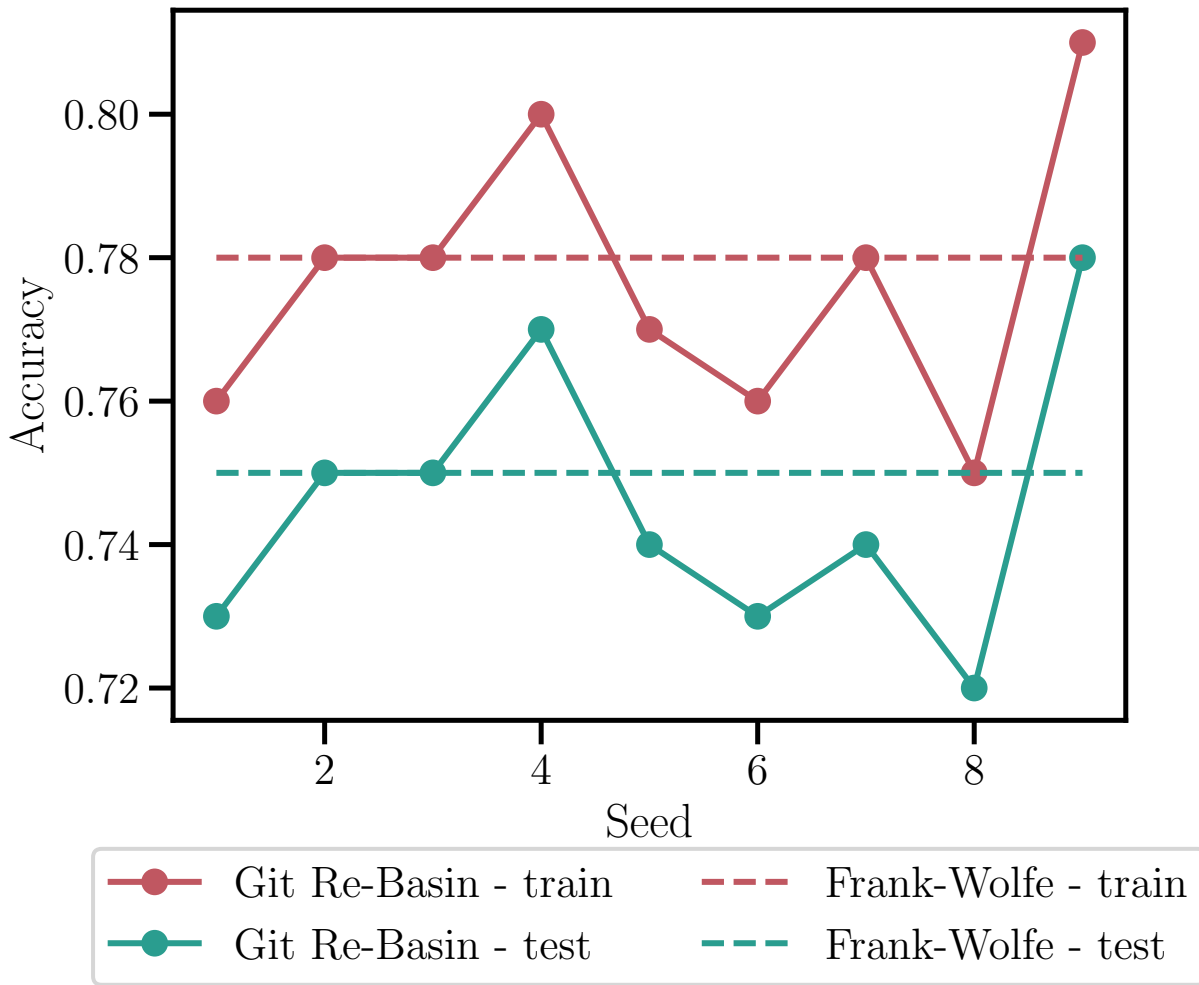

Supplement: supplementary_material [file attachment]

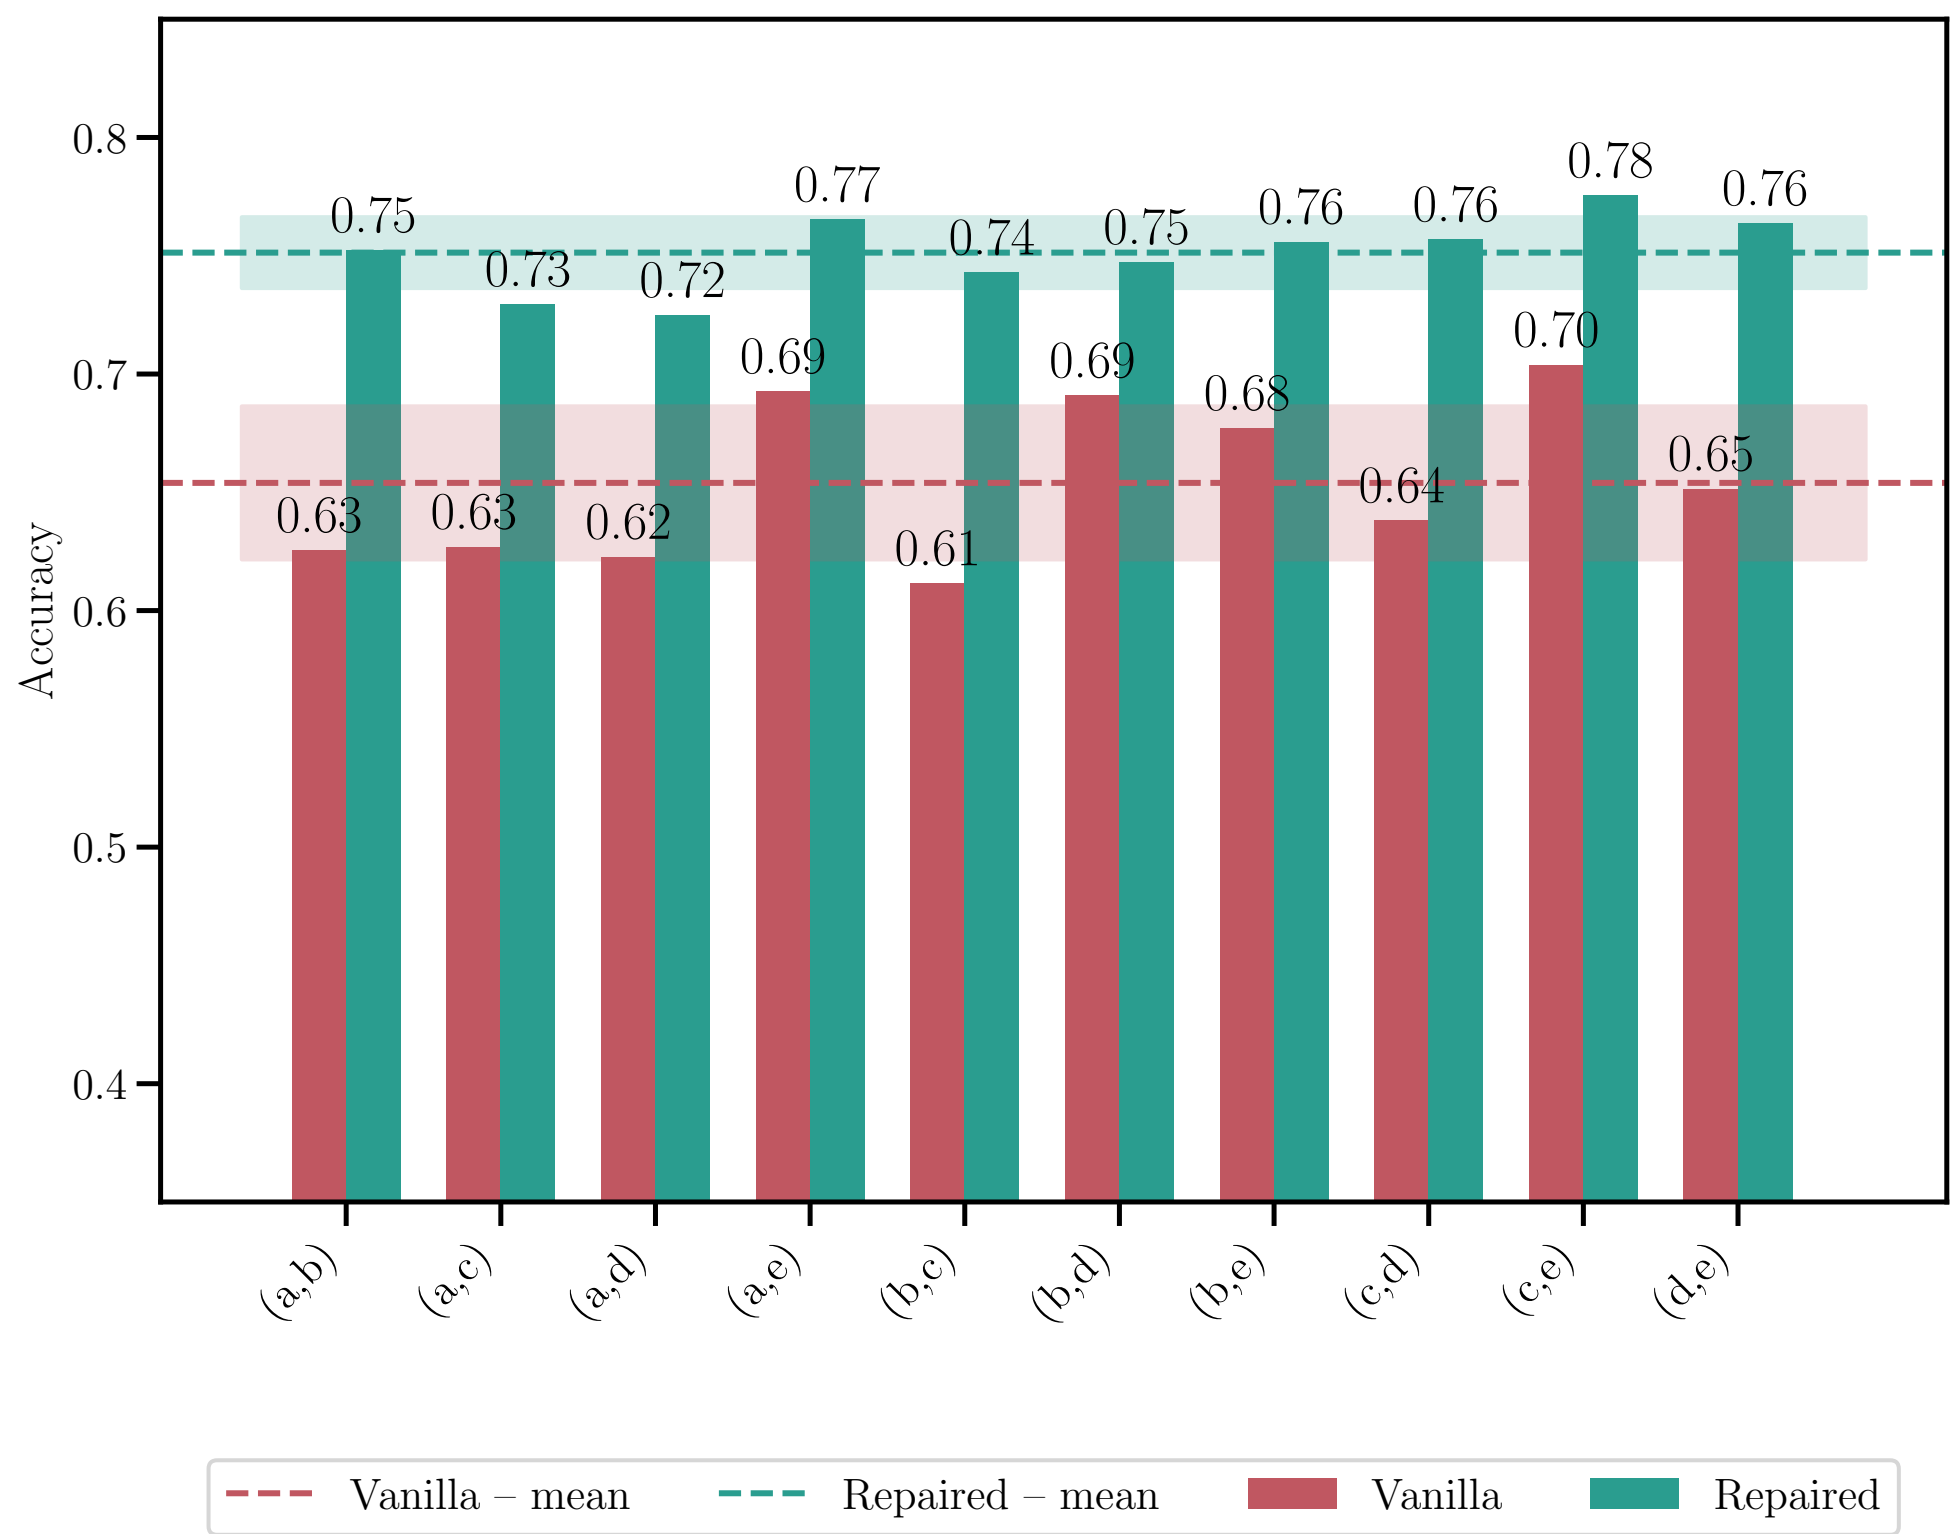

Supplement: supplementary_material [file attachment]

Step size

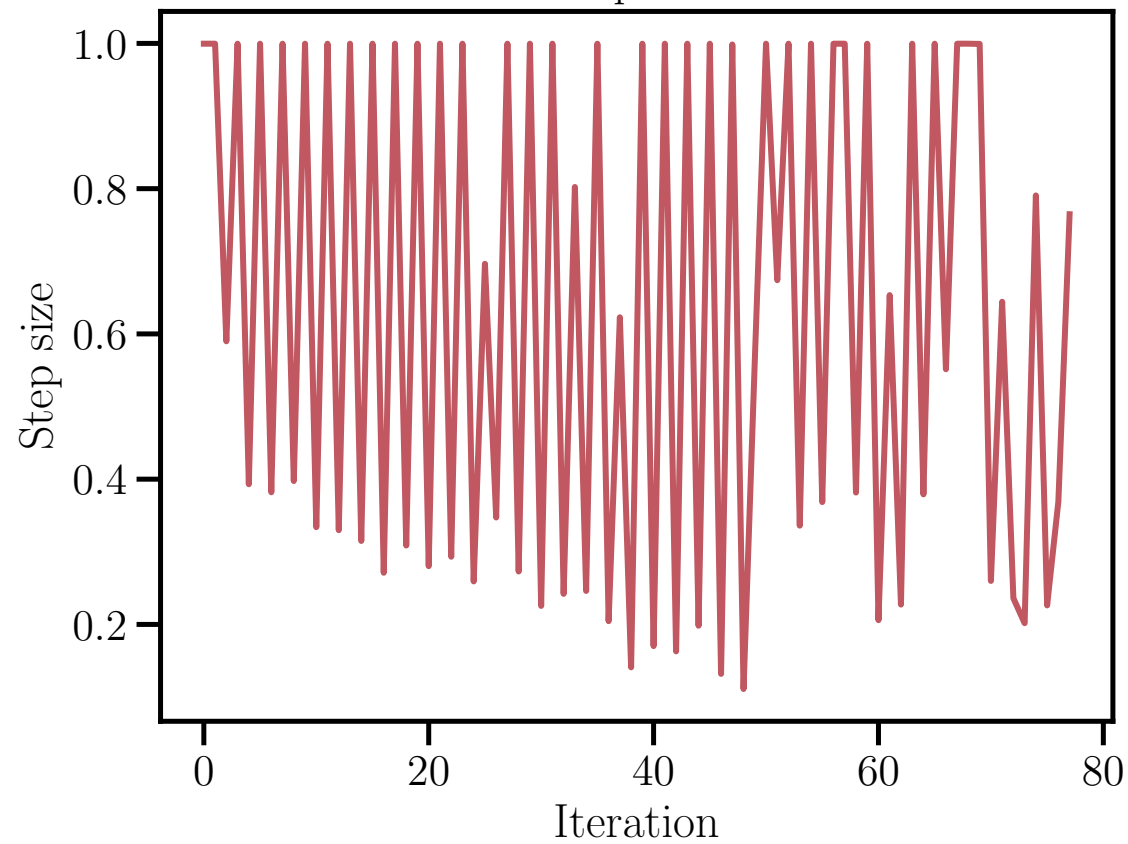

Supplement: supplementary_material [file attachment]

Accuracy

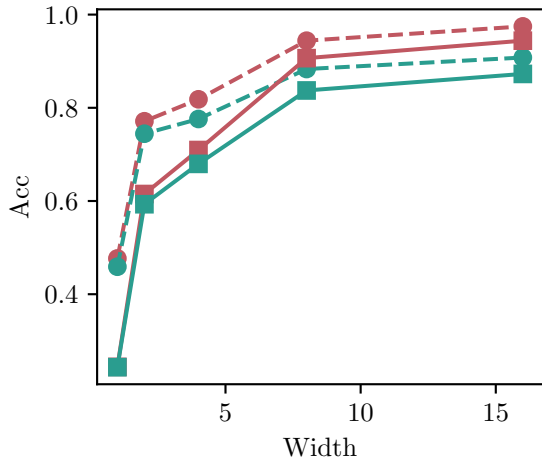

Loss

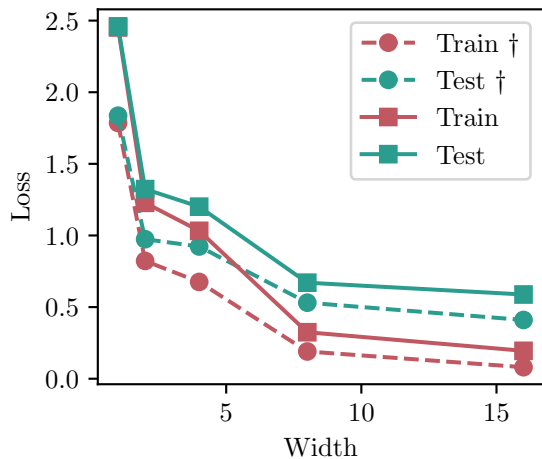

Supplement: supplementary_material [file attachment]

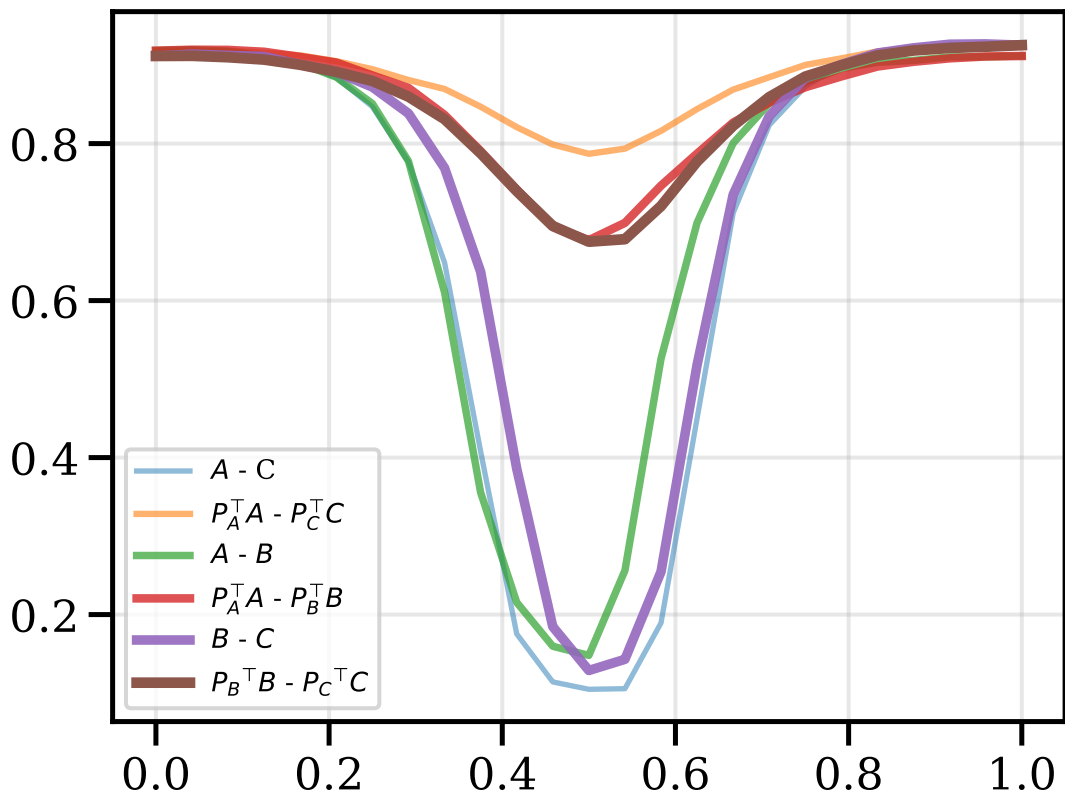

Supplement: supplementary_material [file attachment]

Accuracy when averaging in different basins

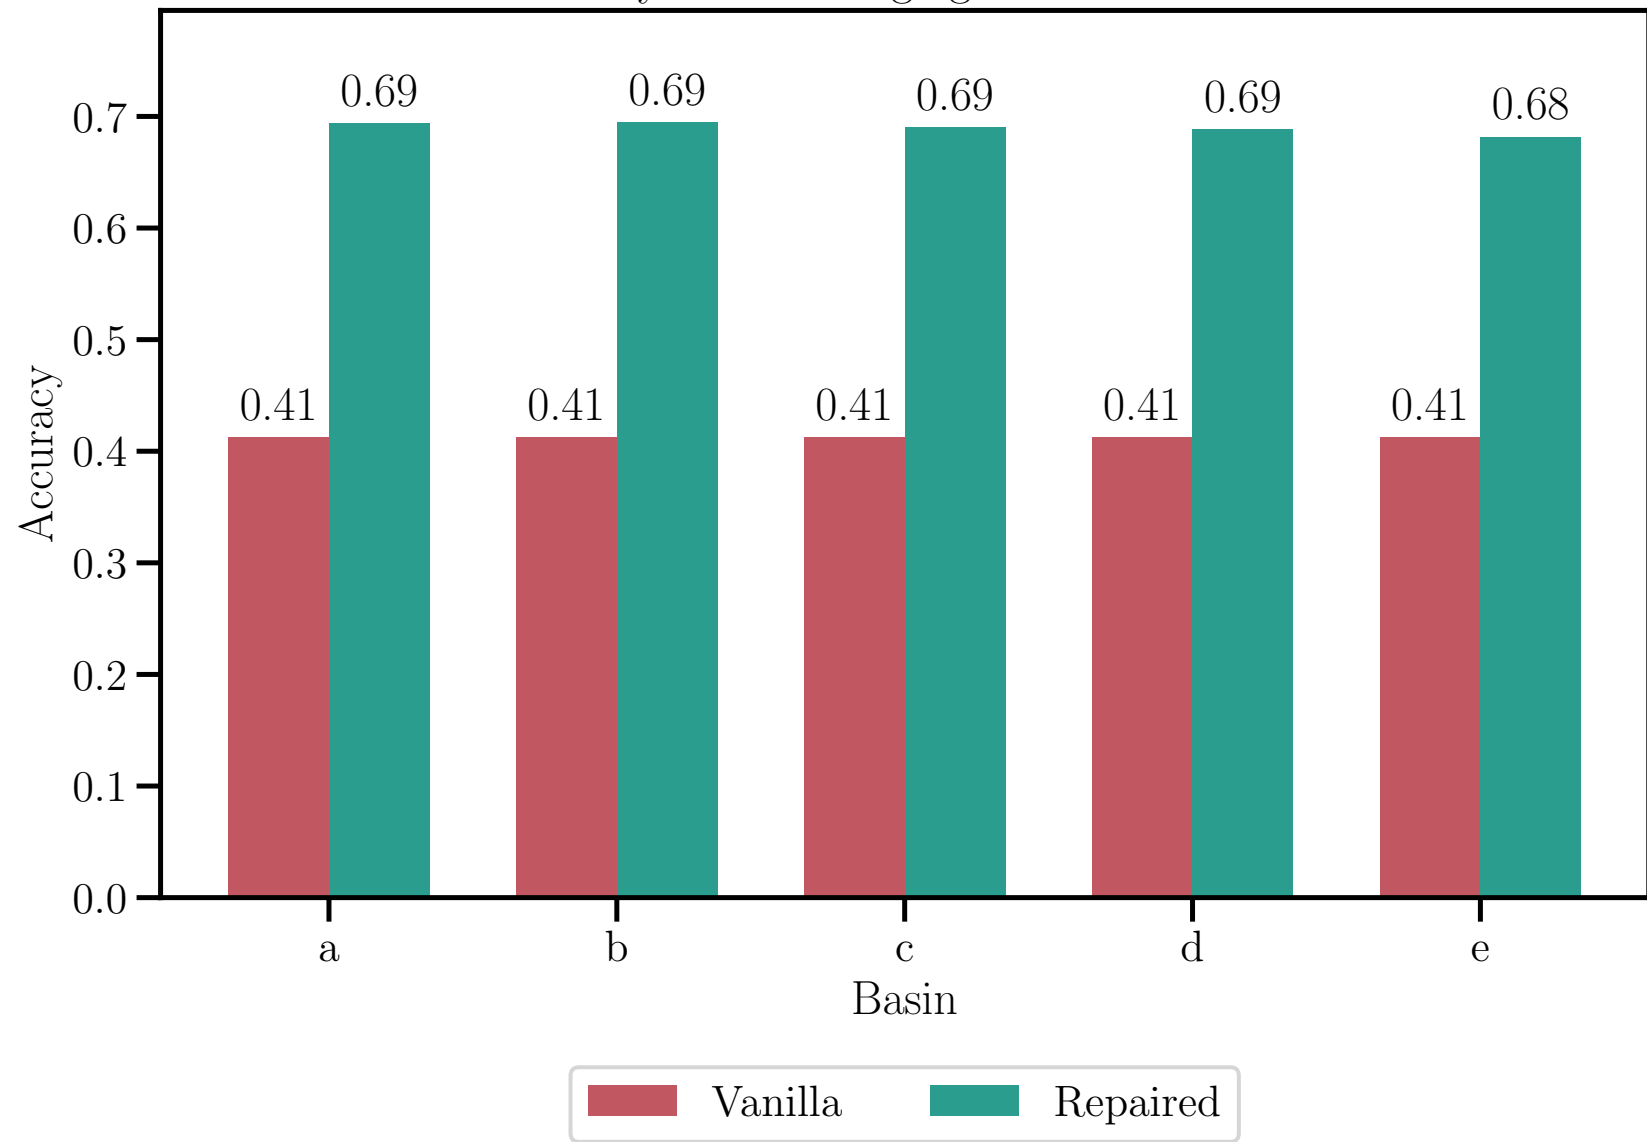

Supplement: supplementary_material [file attachment]

Accuracy

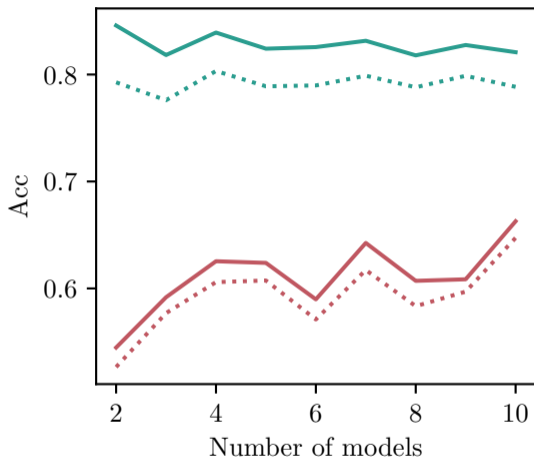

Loss

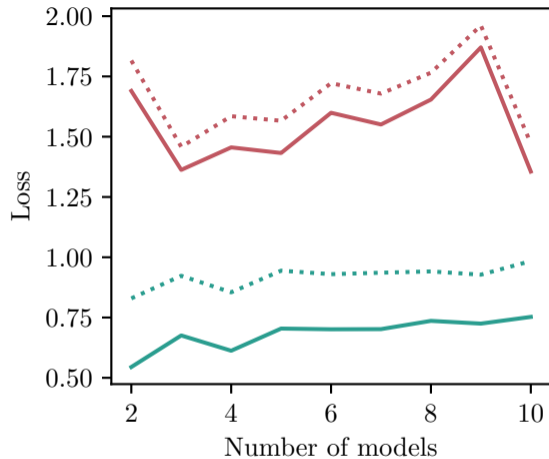

— MergeMany (train)

..... MergeMany (test)

—  $C^2M^3$  (train).....  $C^2M^3$  (test)

Supplement: supplementary_material [file attachment]

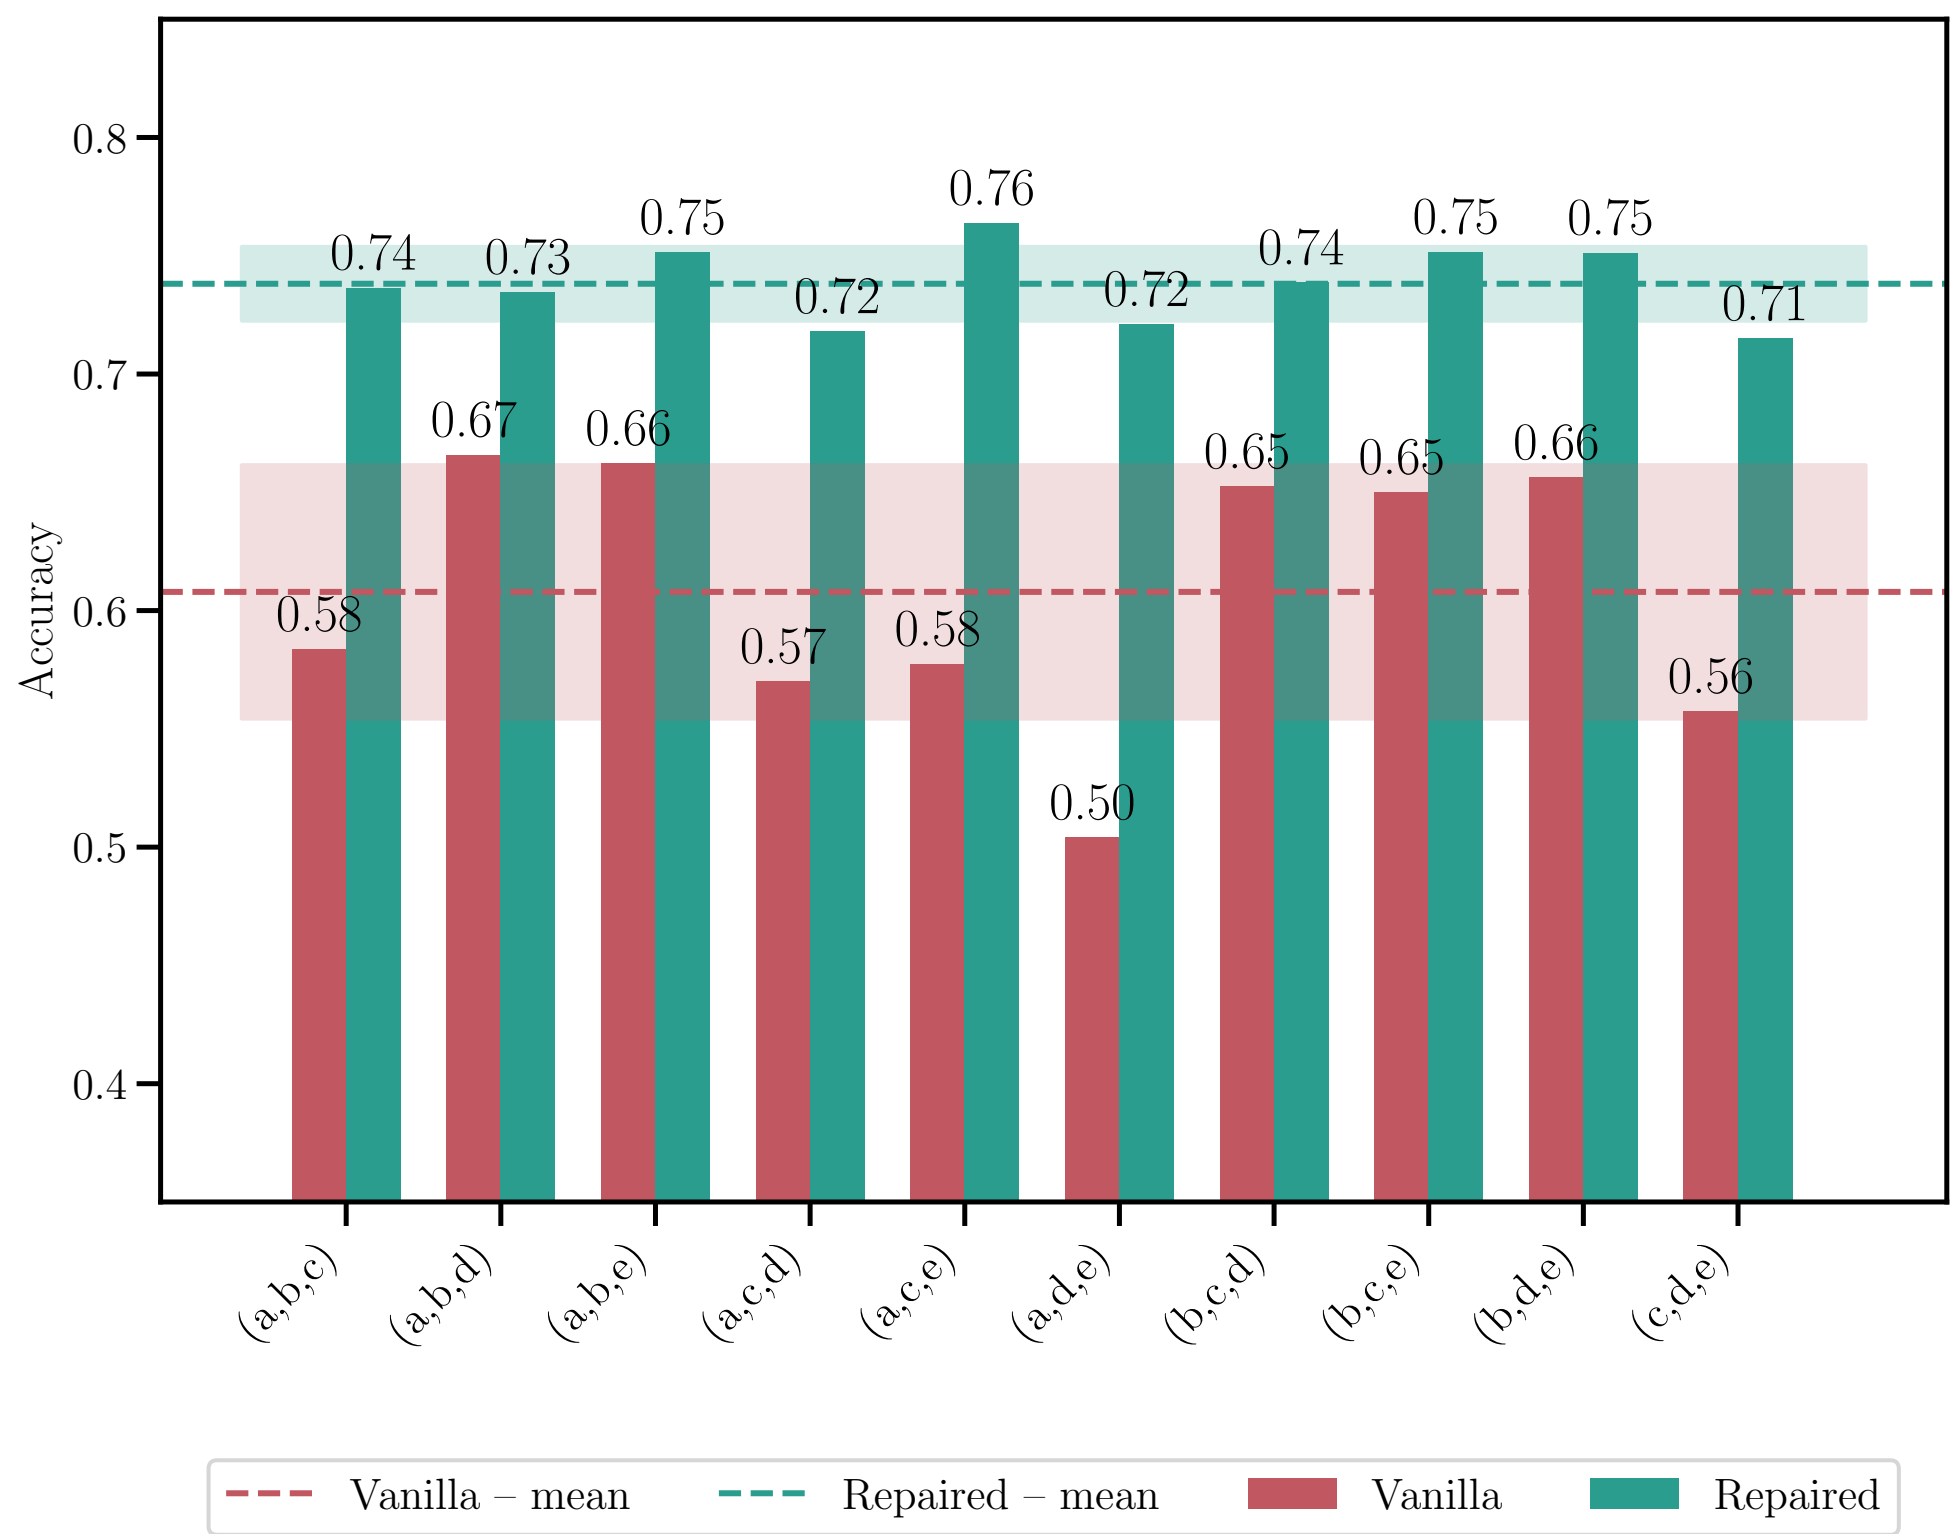

Supplement: supplementary_material [file attachment]

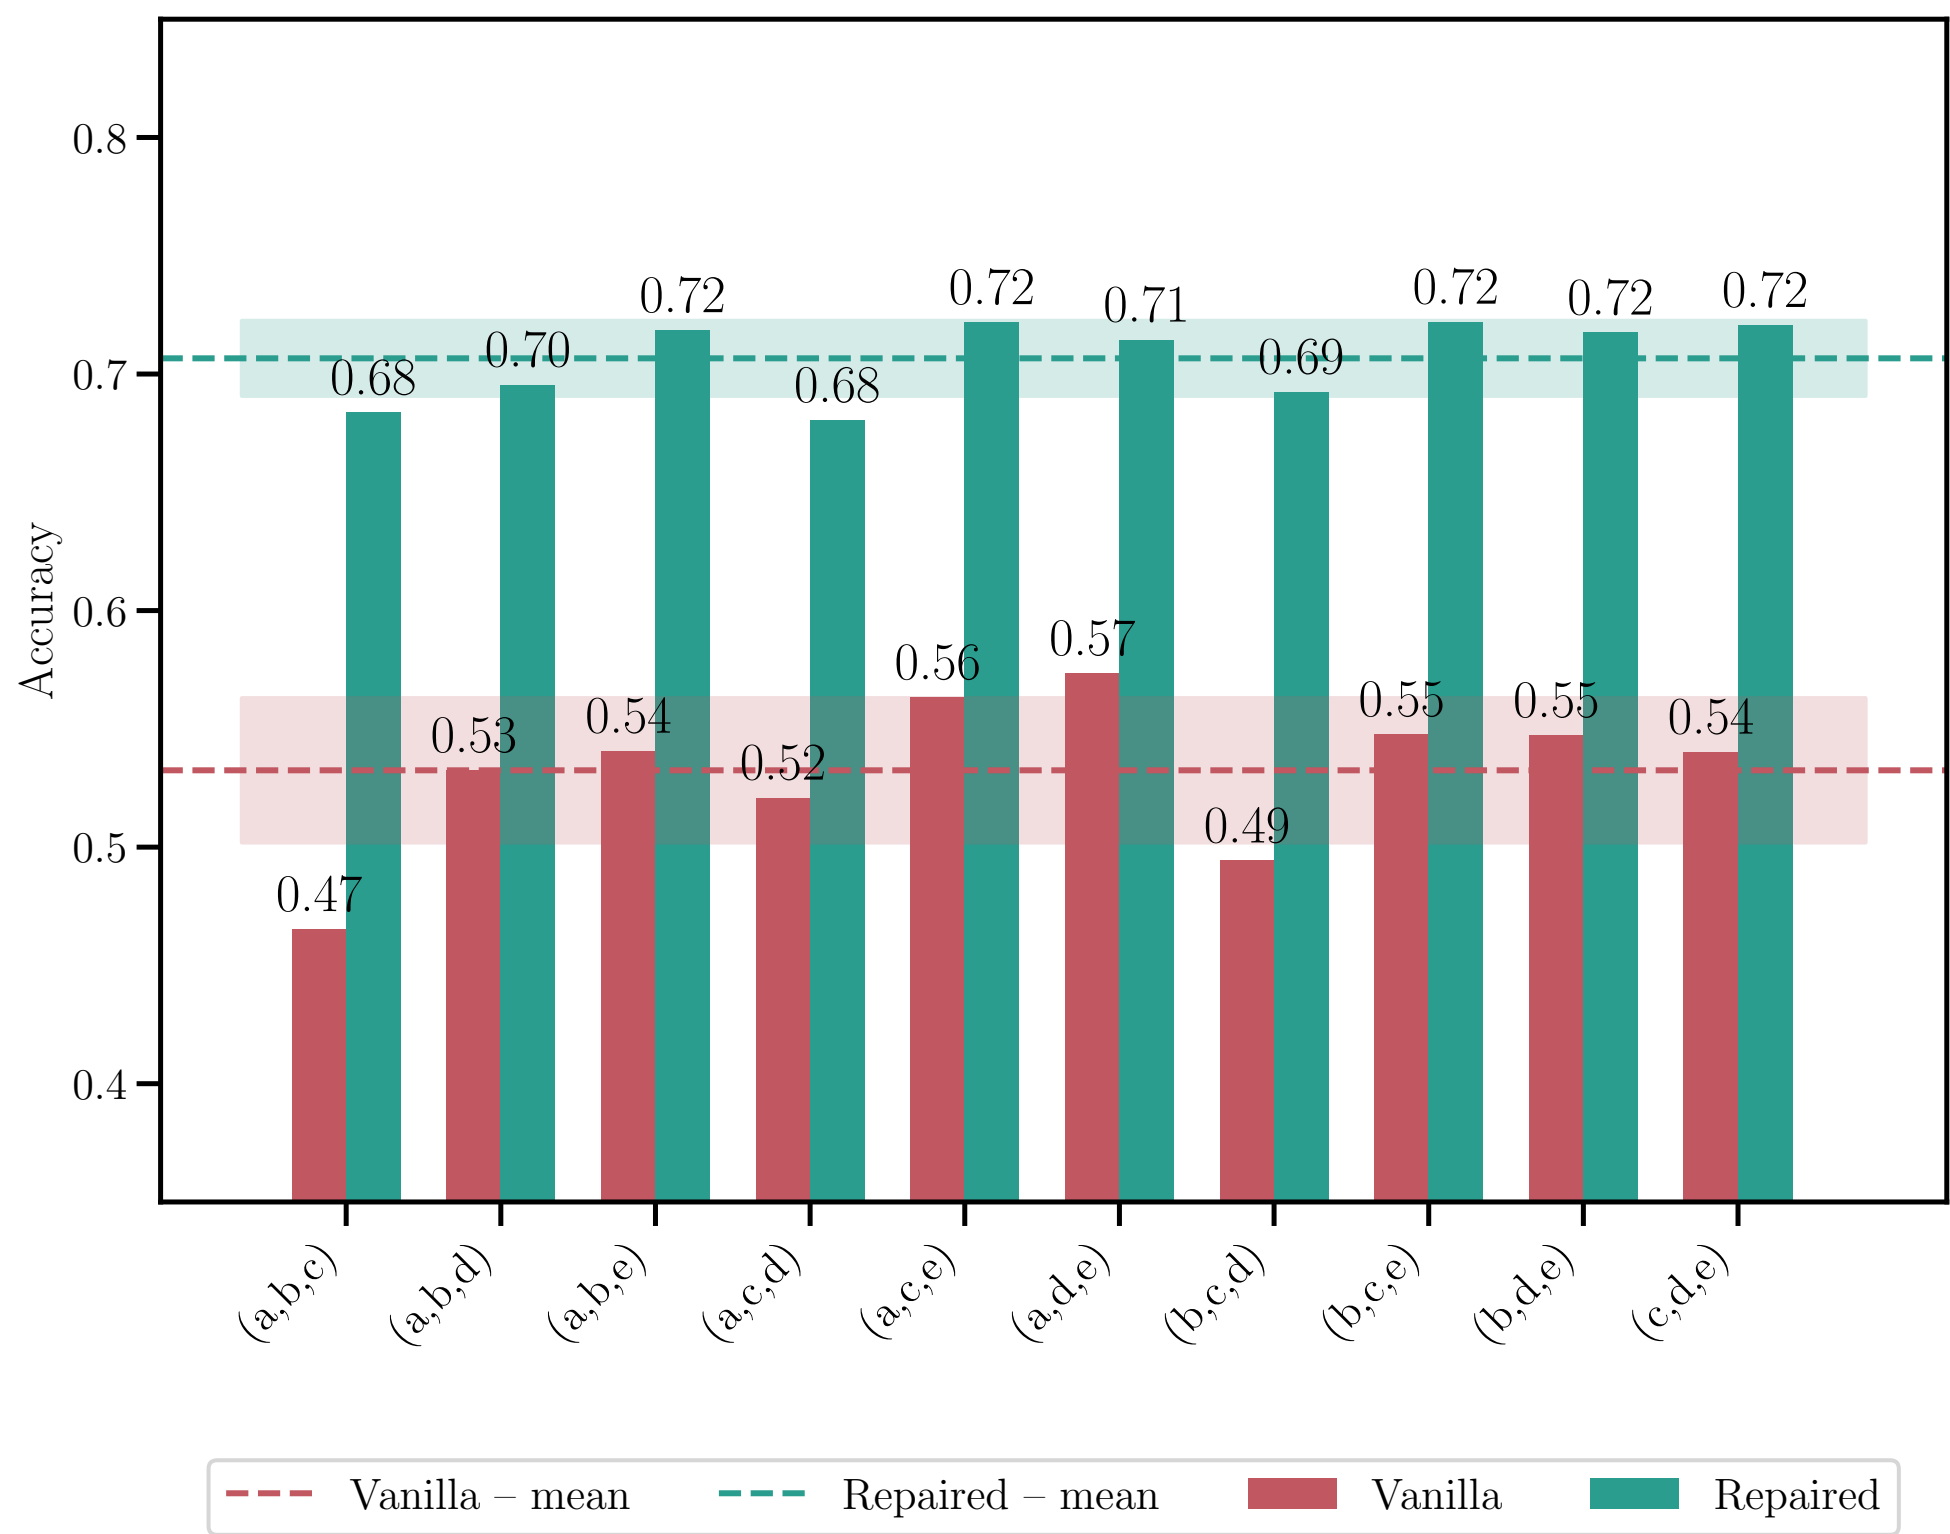

Supplement: supplementary_material [file attachment]

Accuracy

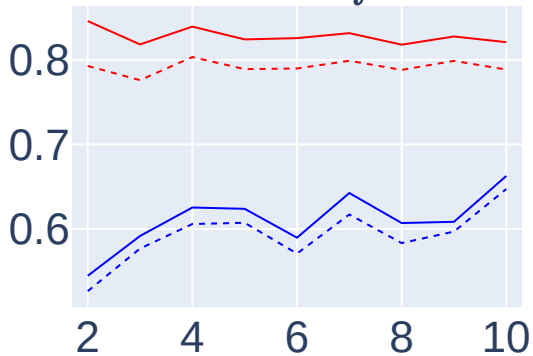

— MergeMany  
(train)

- - MergeMany  
(test)

Loss

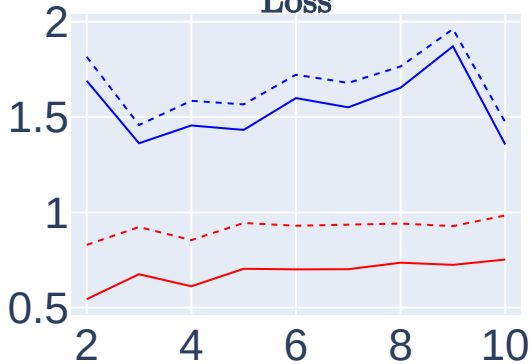

—  $C^2 M^3$   
(train)

- -  $C^2 M^3$   
(test)

Supplement: supplementary_material [file attachment]

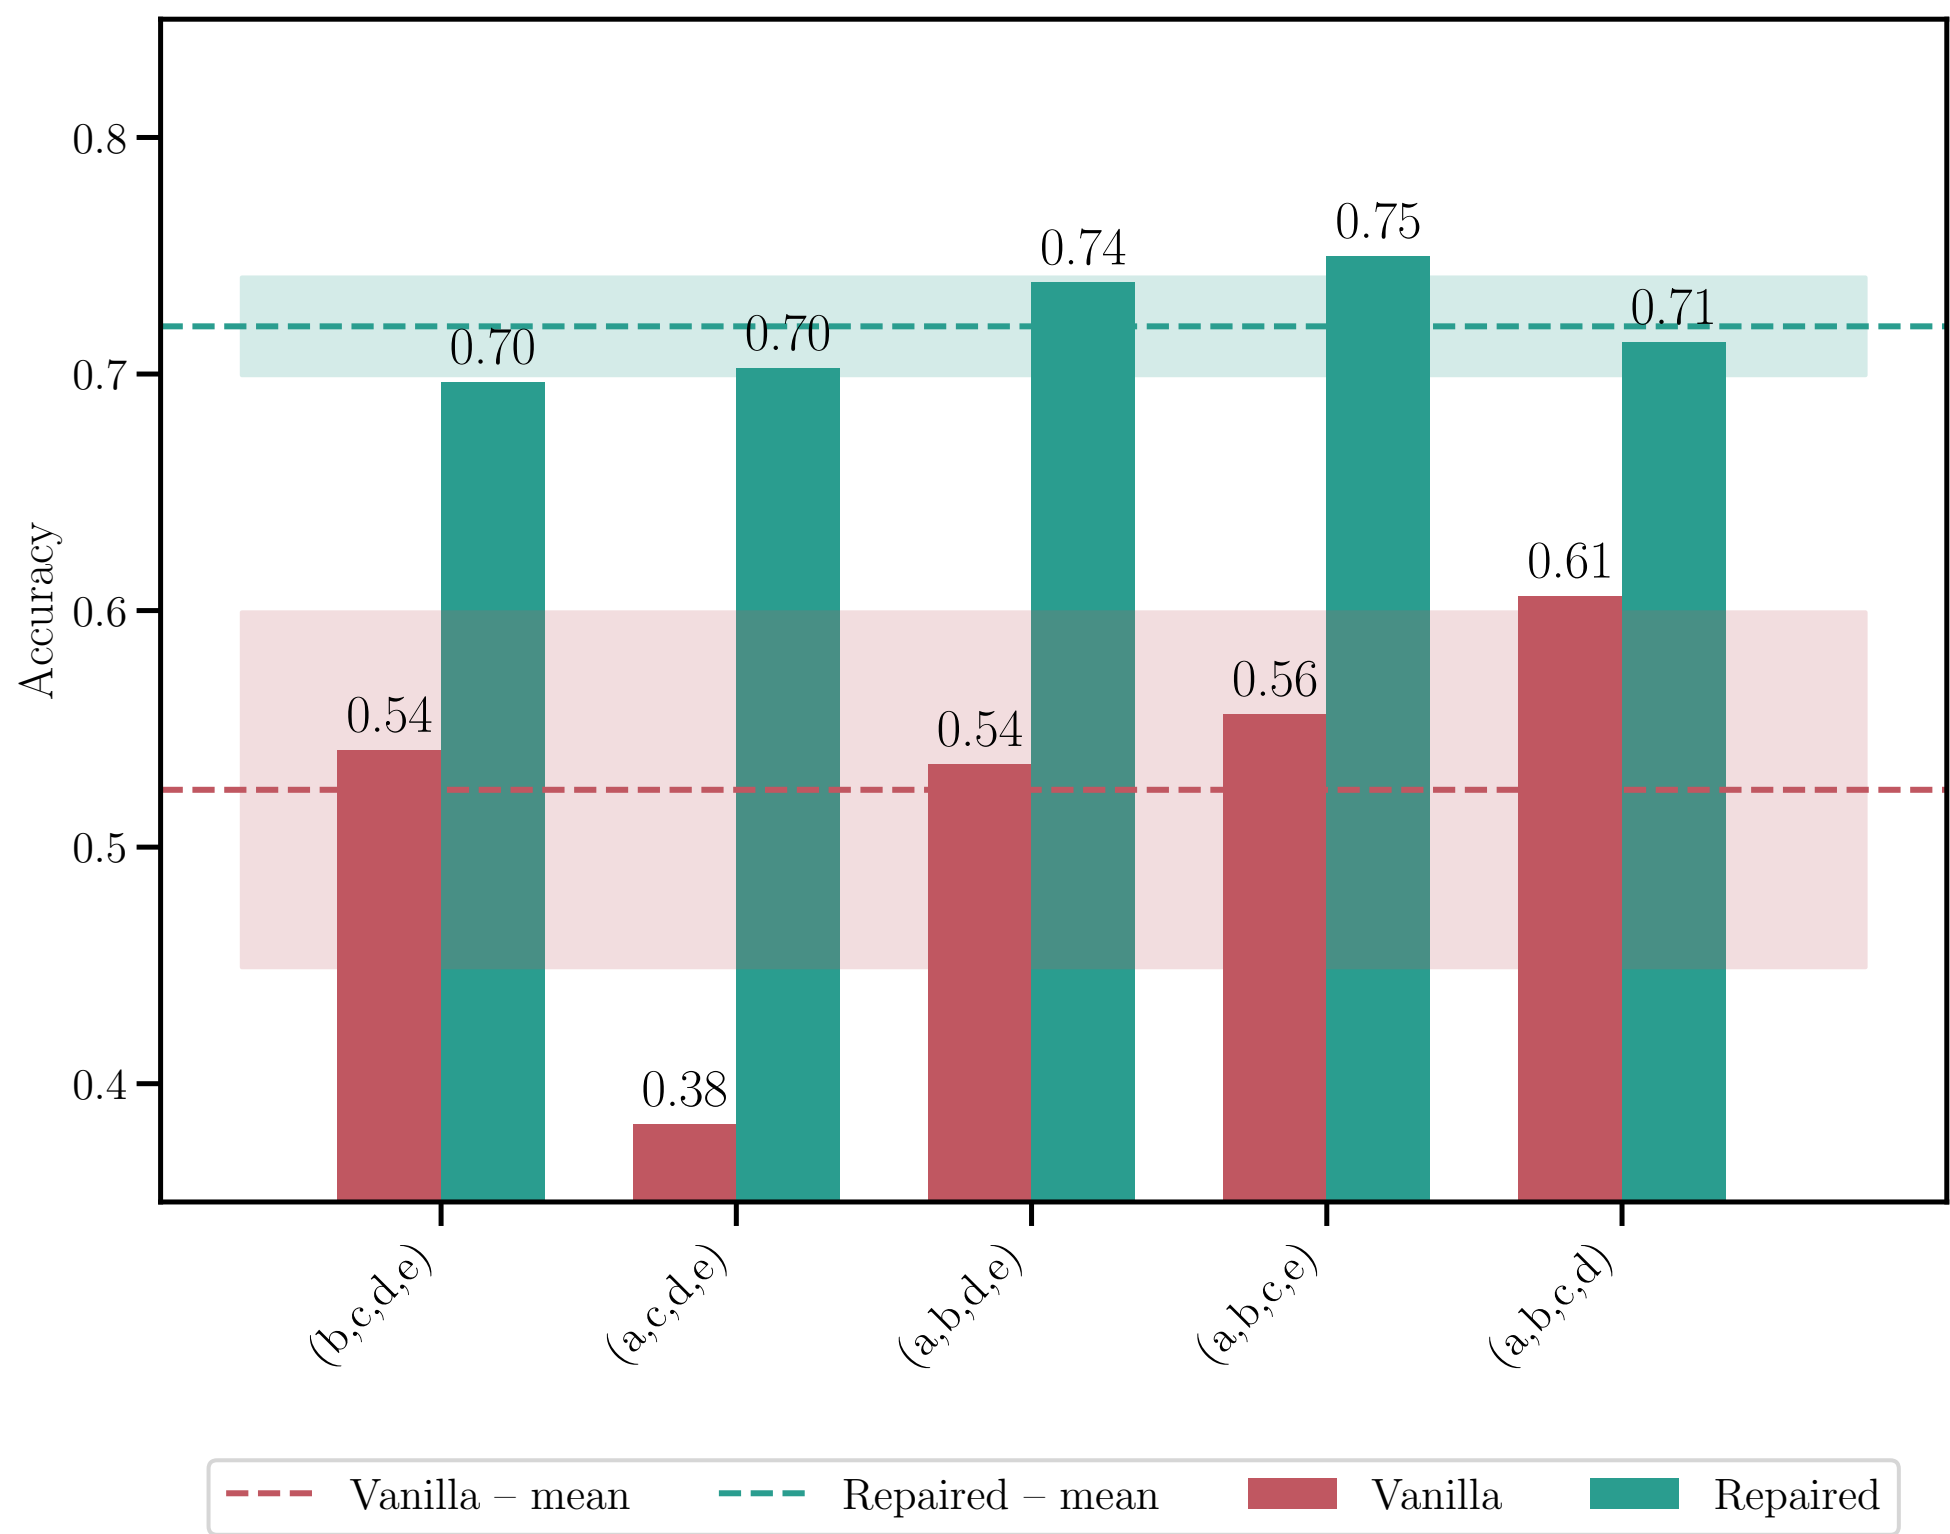

Supplement: supplementary_material [file attachment]

Step size for even iterations

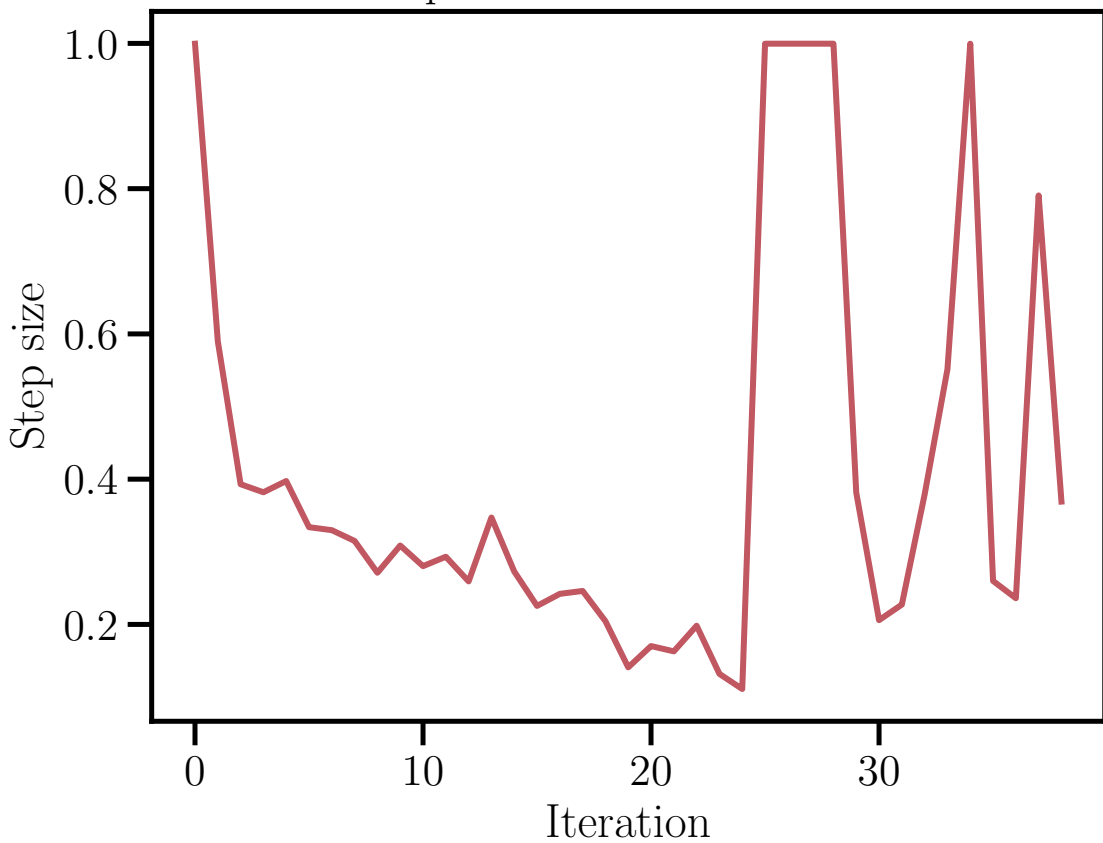

Supplement: supplementary_material [file attachment]

Cosine similarity

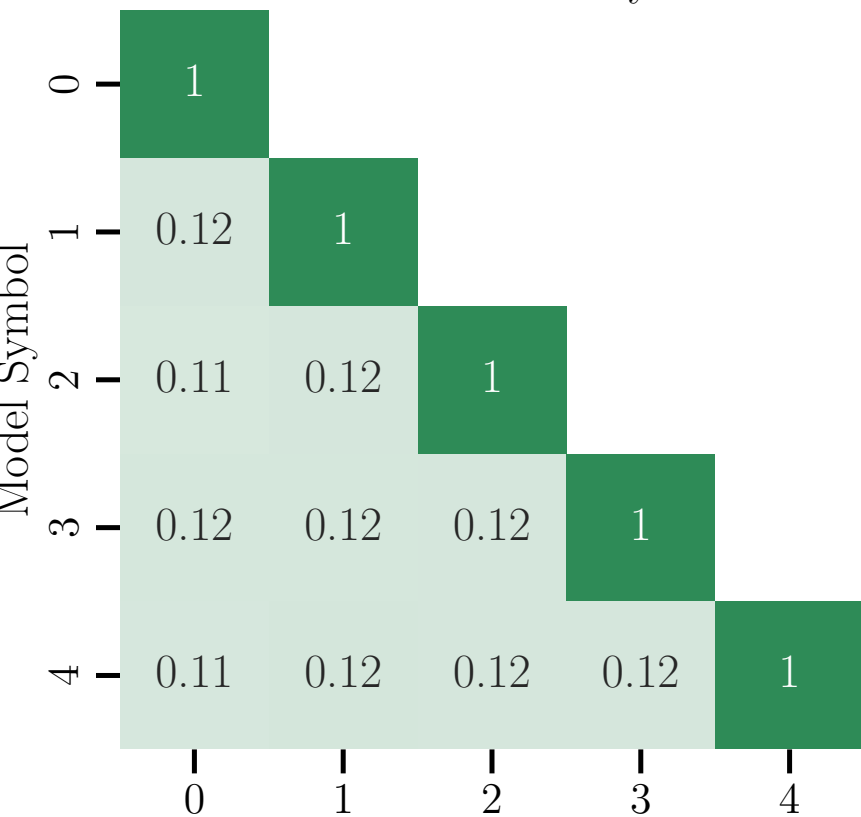

Supplement: supplementary_material [file attachment]

Cosine Similarity

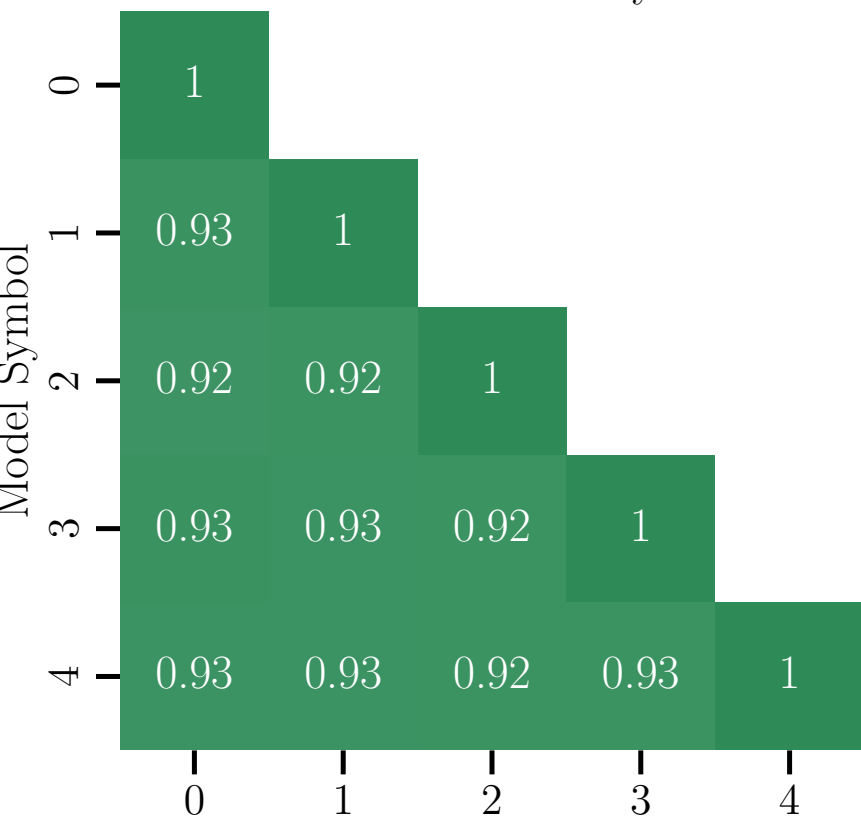

Supplement: supplementary_material [file attachment]

Accuracy

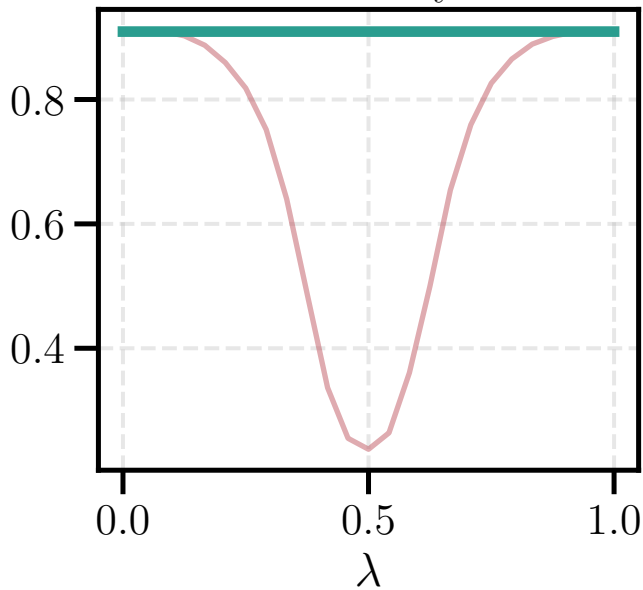

Loss

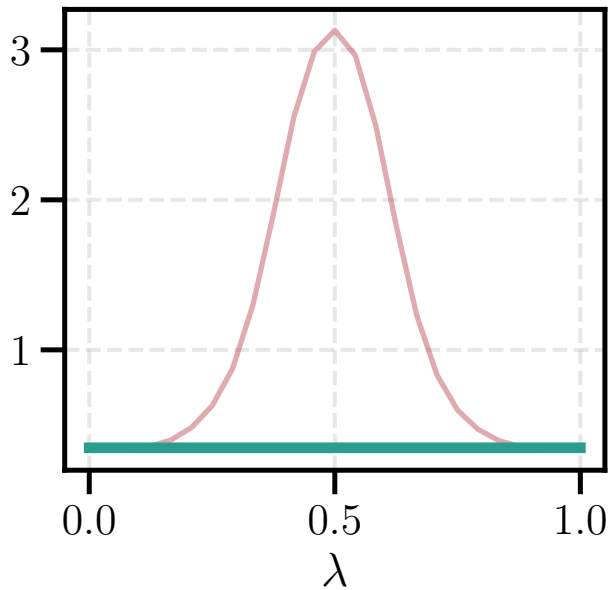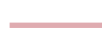

Git Re-Basin

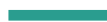 $C^2M^3$

Supplement: supplementary_material [file attachment]

## Euclidean Distance

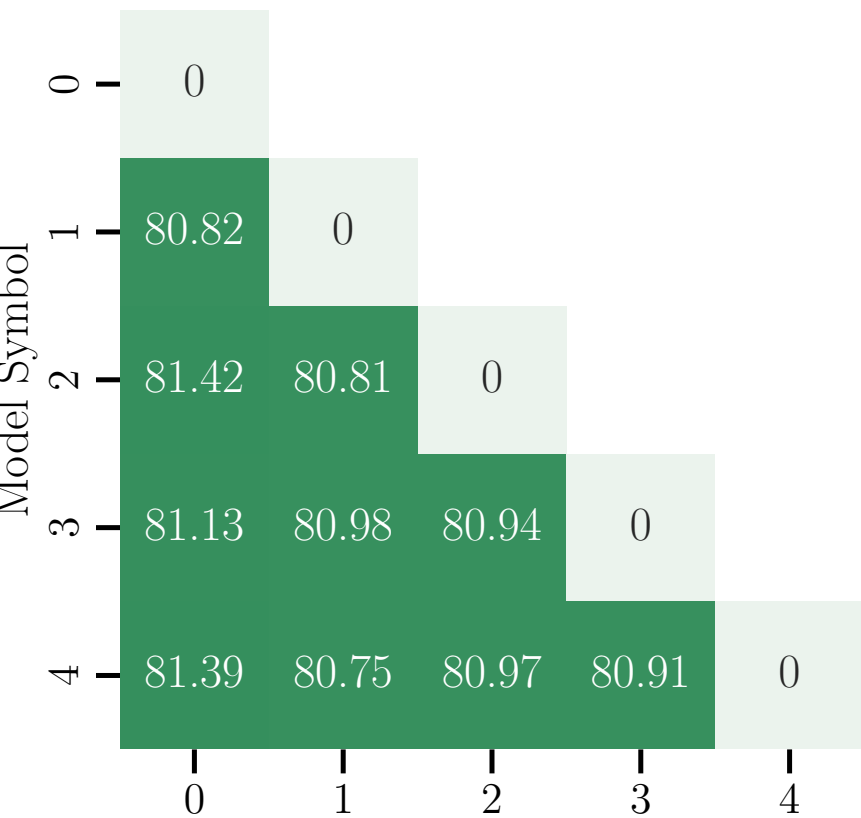

Supplement: supplementary_material [file attachment]

Interpolated models accuracy

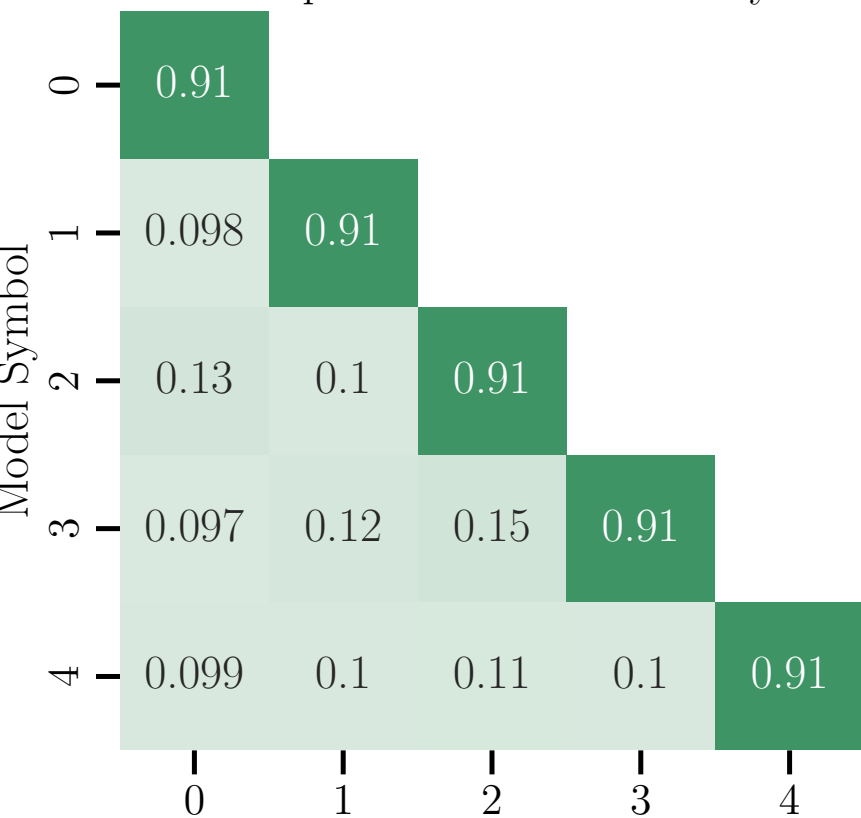

Supplement: supplementary_material [file attachment]

Combined Heatmap of Model Distances

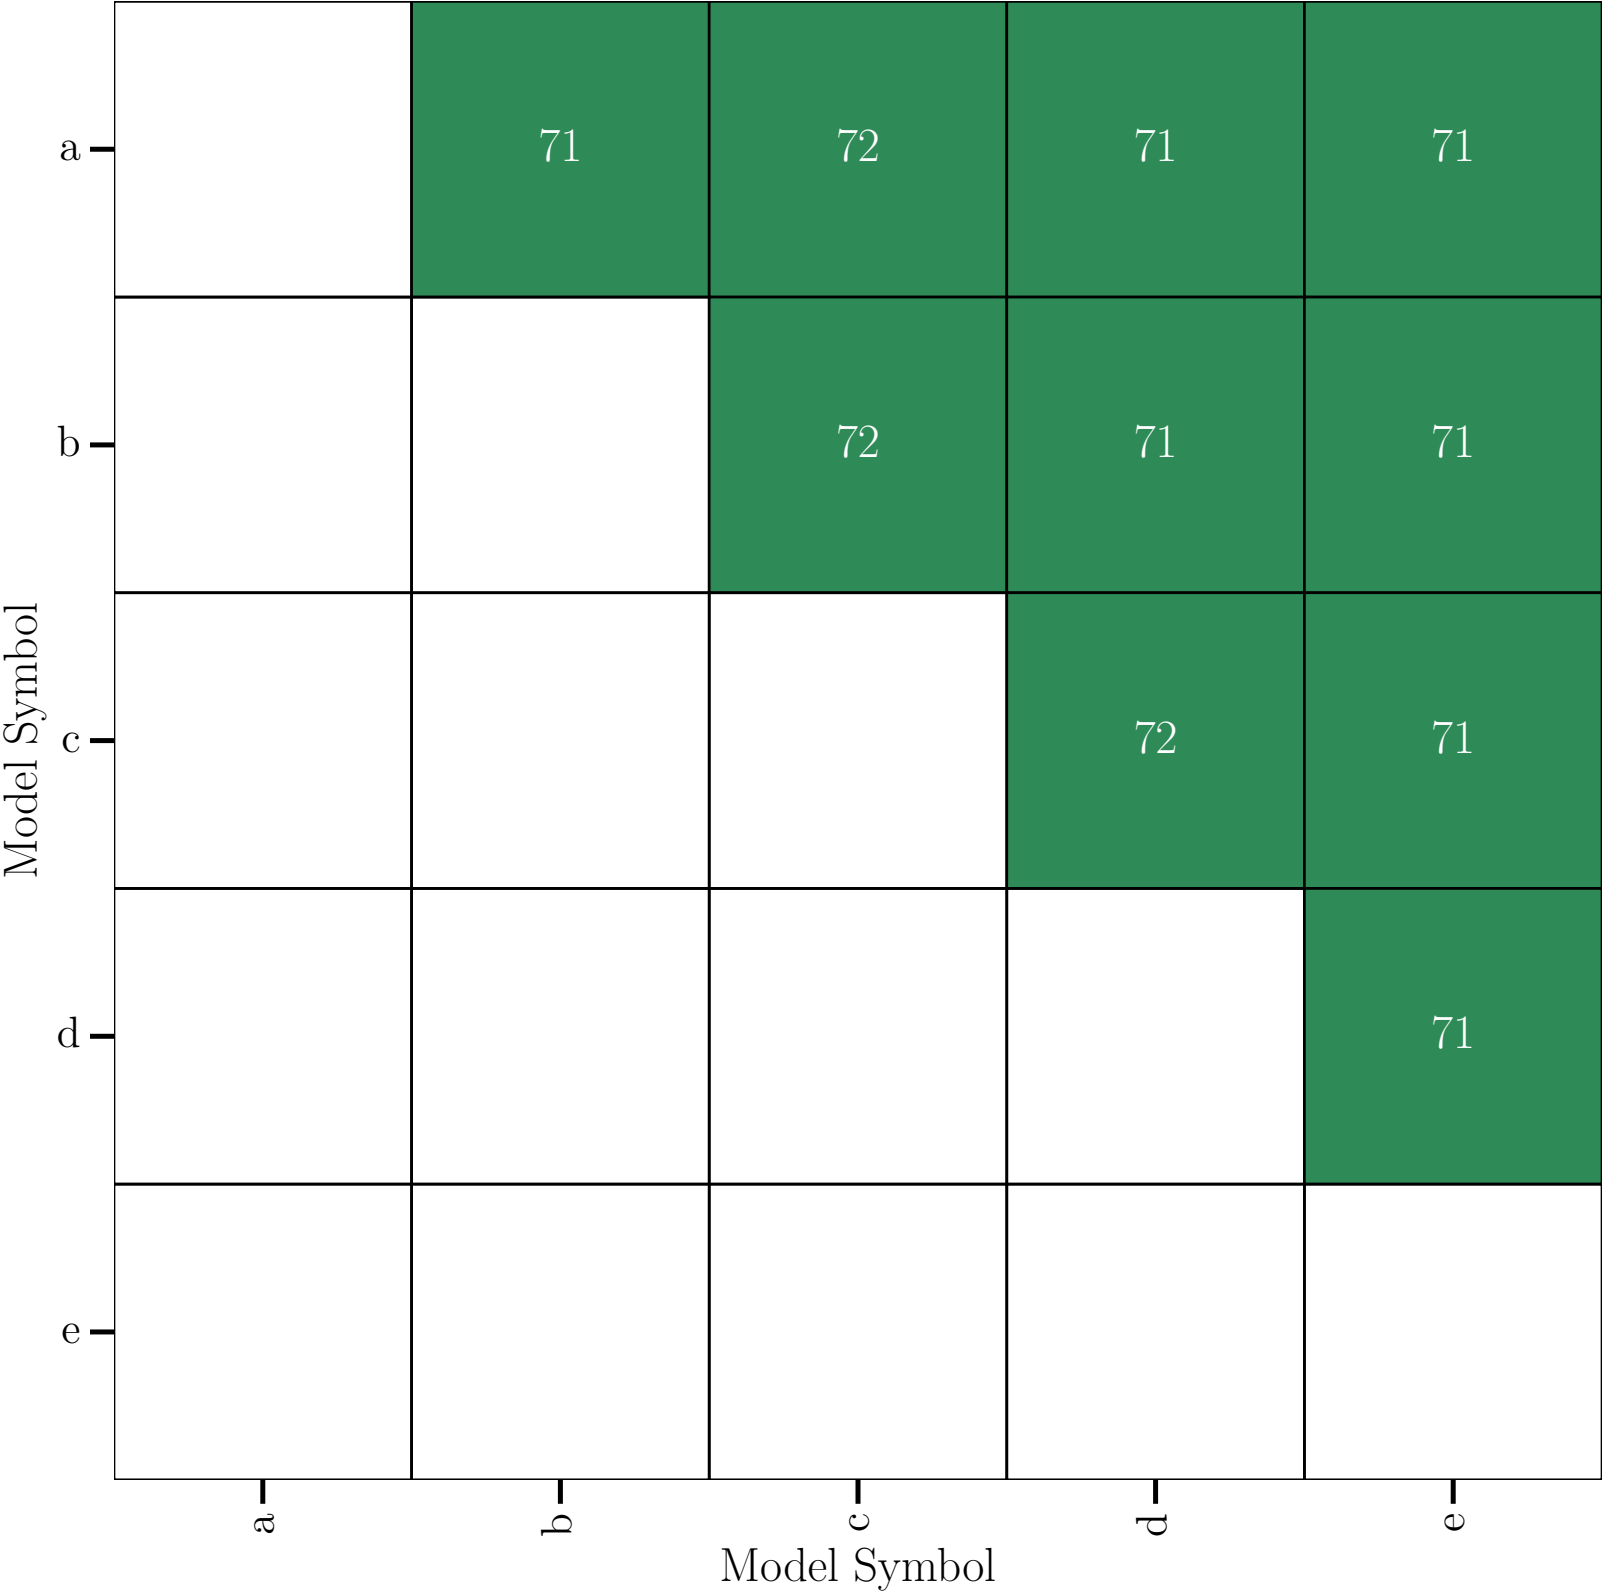

Supplement: supplementary_material [file attachment]

Objective curve

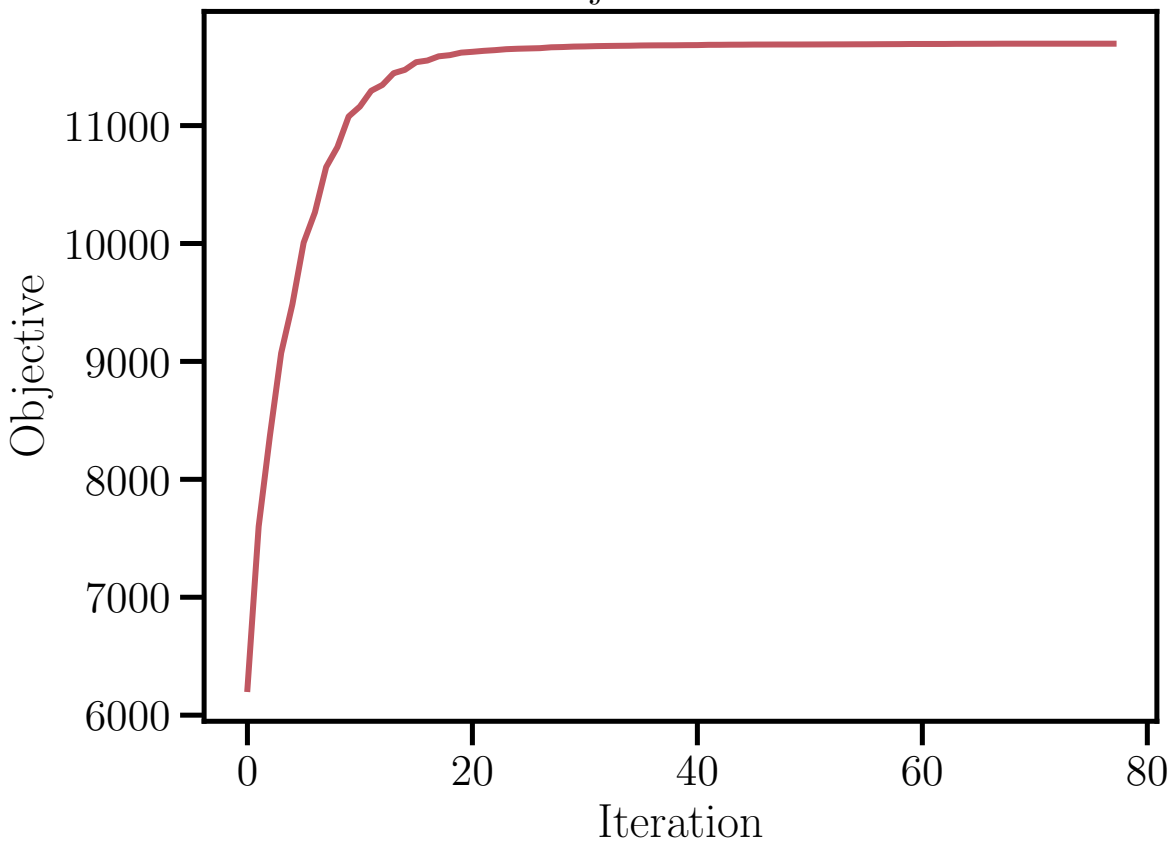

Supplement: supplementary_material [file attachment]

Accuracy

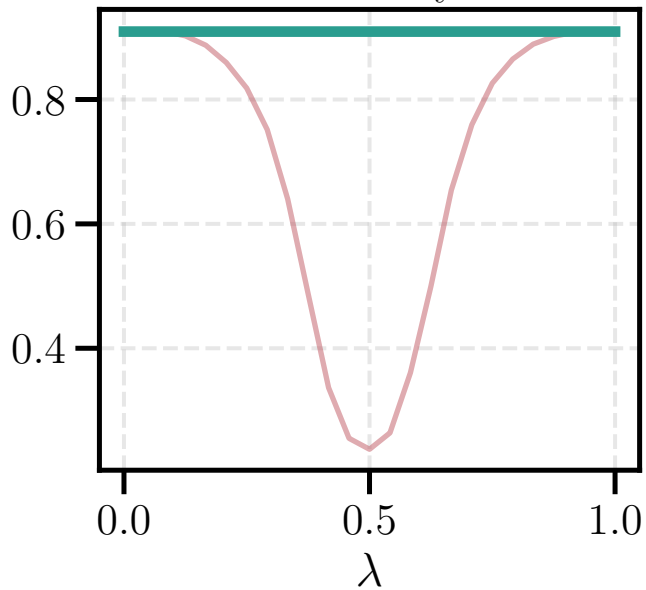

Loss

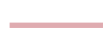

Git Re-Basin

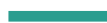 $C^2M^3$

Supplement: supplementary_material [file attachment]

Accuracy

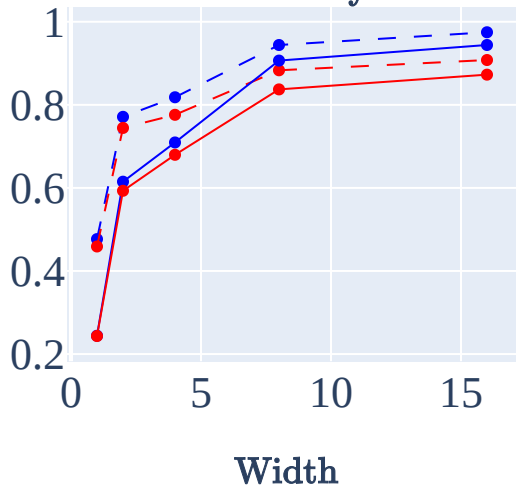

Loss

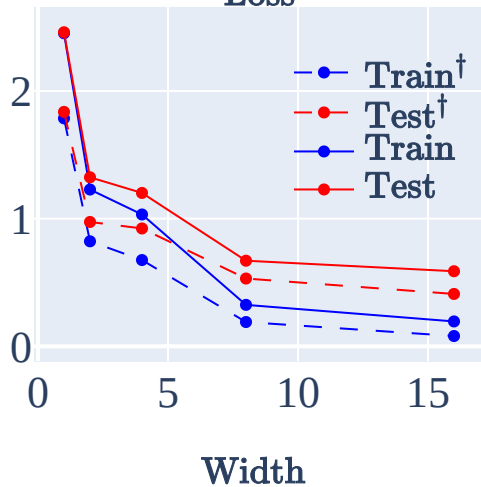

Supplement: supplementary_material [file attachment]

Accuracy

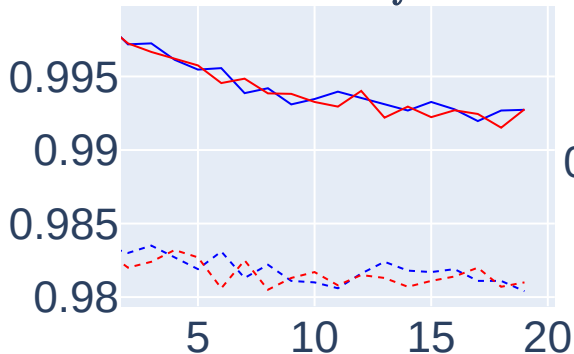

— MergeMany (train)    - - - MergeMany (test)

Loss

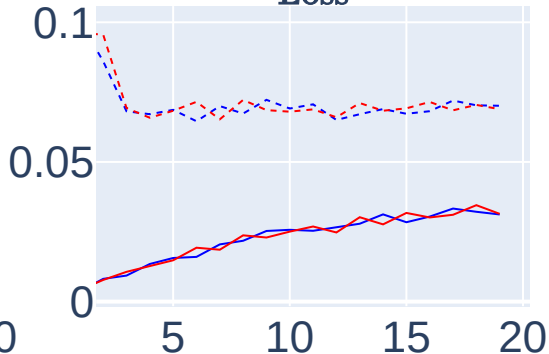

—  $C^2 M^3$  (train)    - - -  $C^2 M^3$  (test)

Supplement: supplementary_material [file attachment]

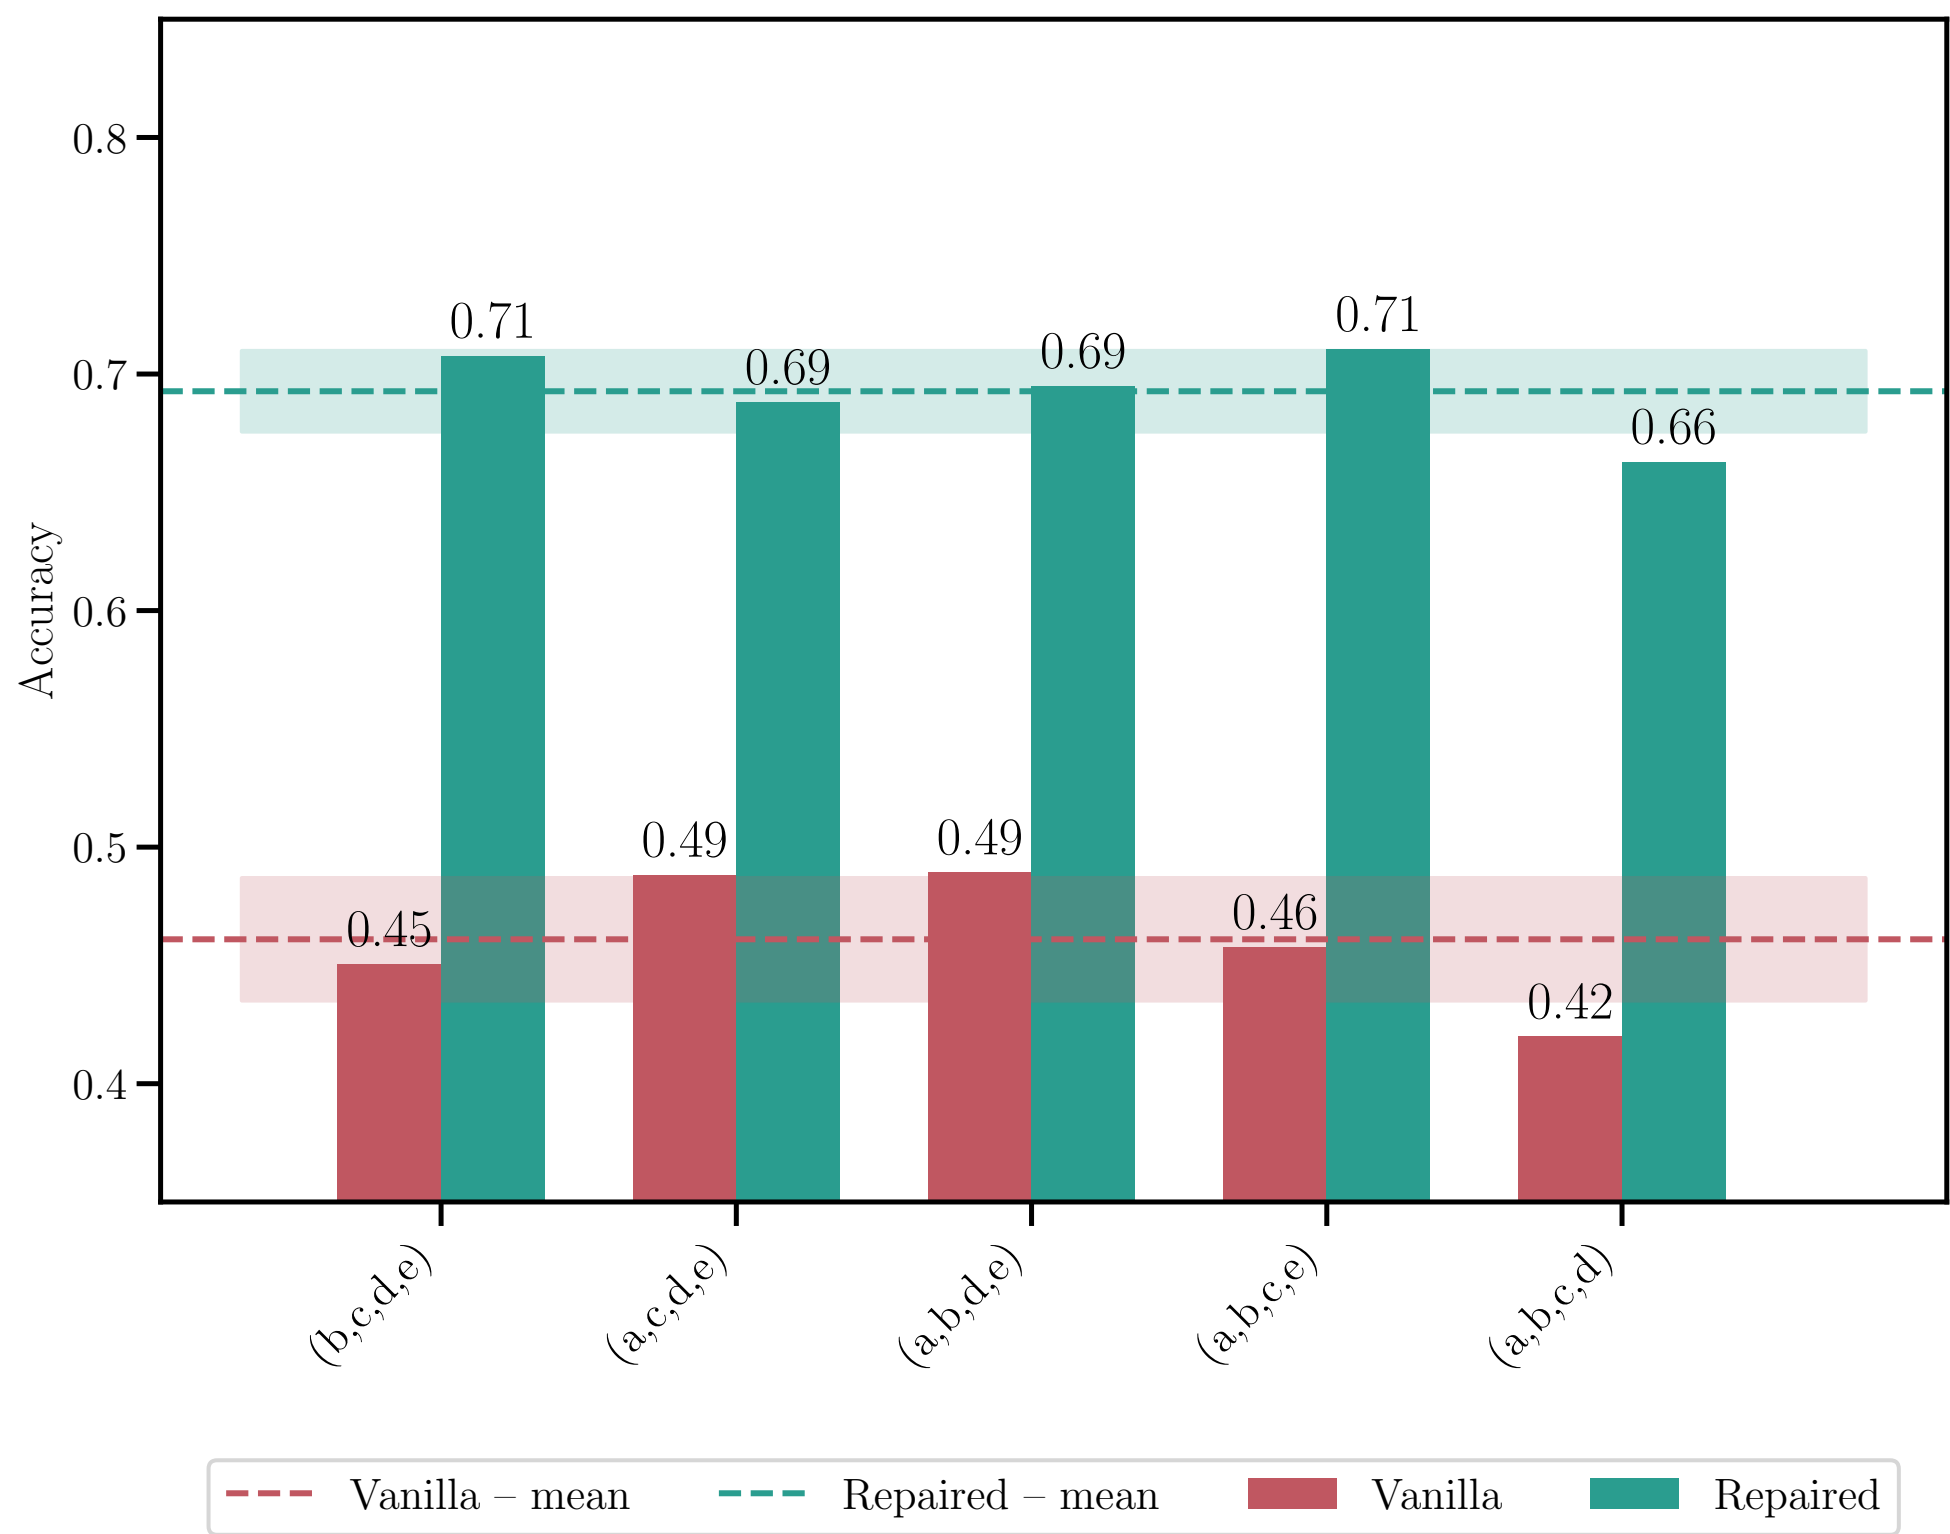

Supplement: supplementary_material [file attachment]

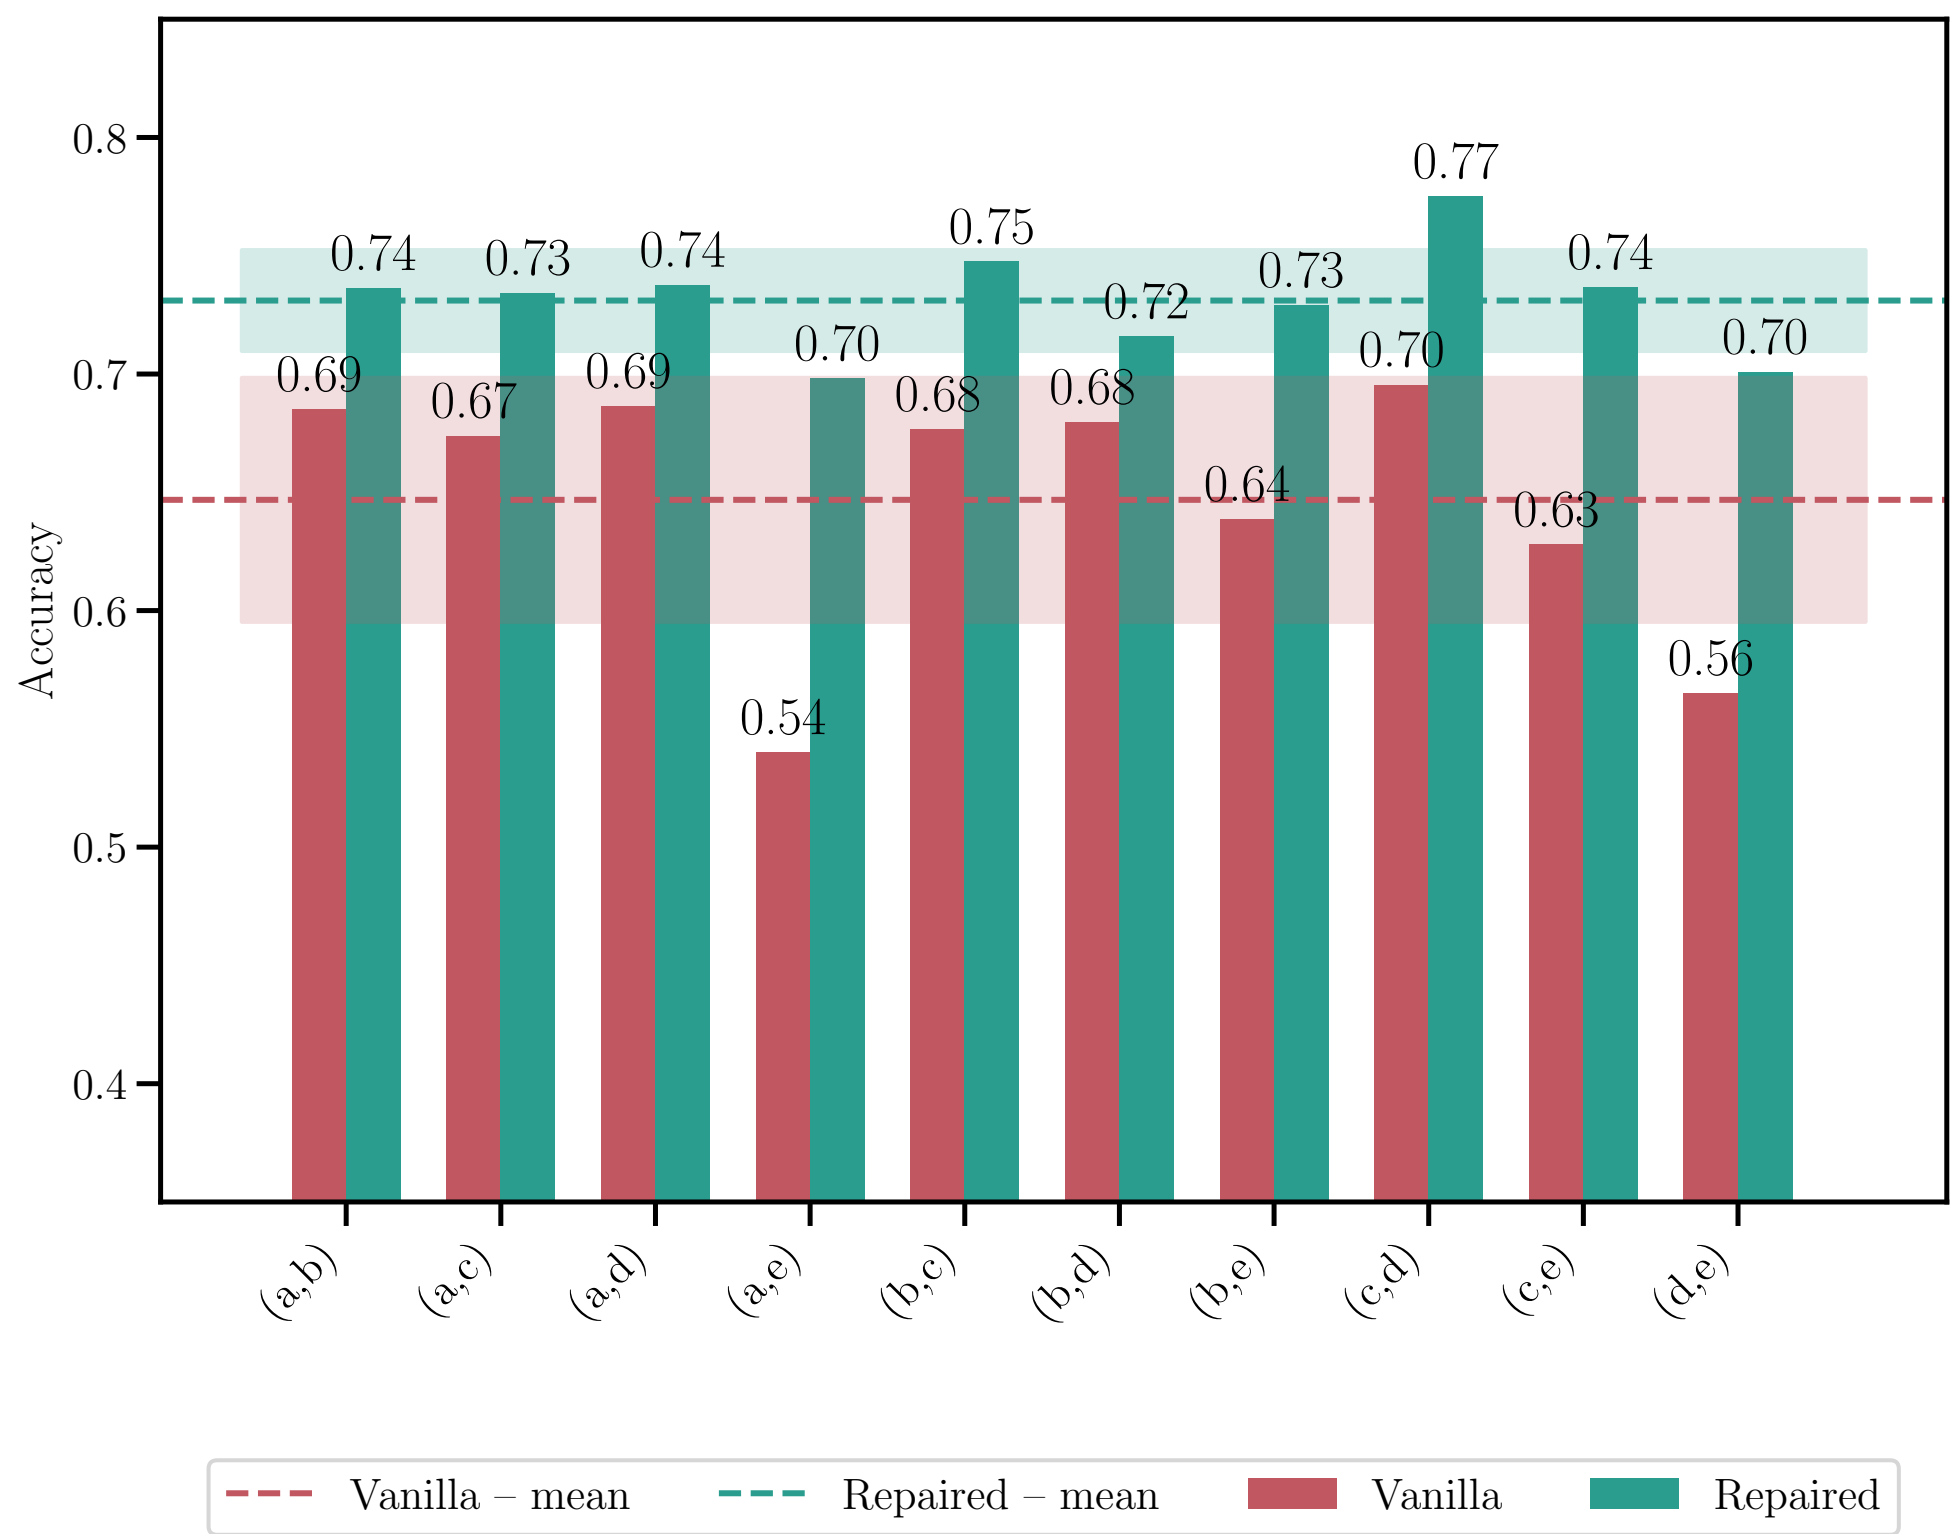

Supplement: supplementary_material [file attachment]

Accuracy of the merged model for different reference models

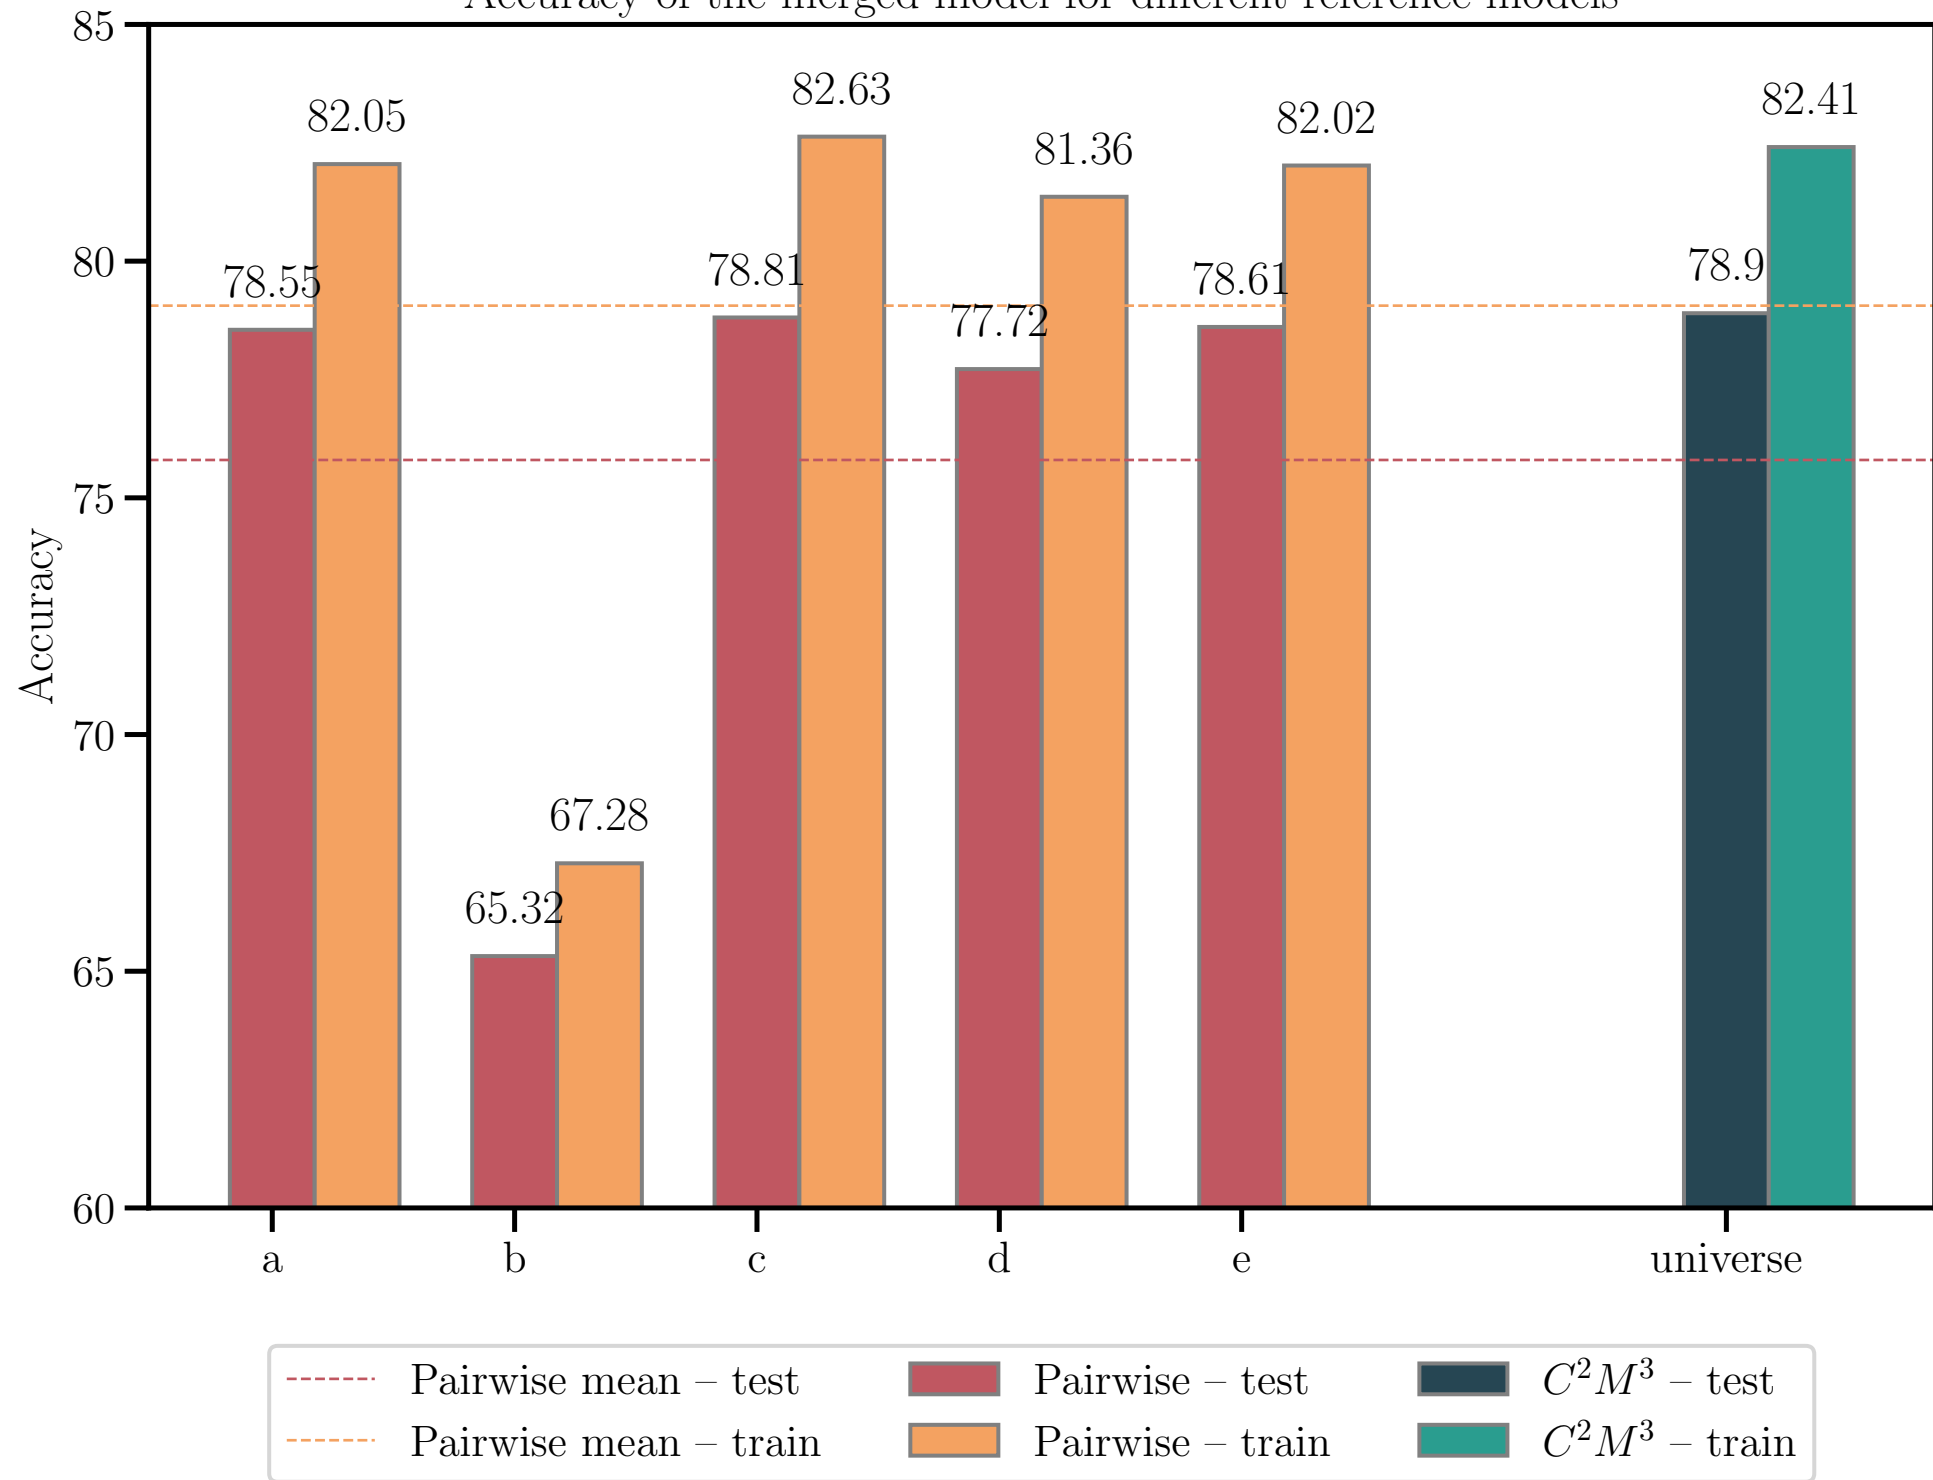

Supplement: supplementary_material [file attachment]

Euclidean distance between representations

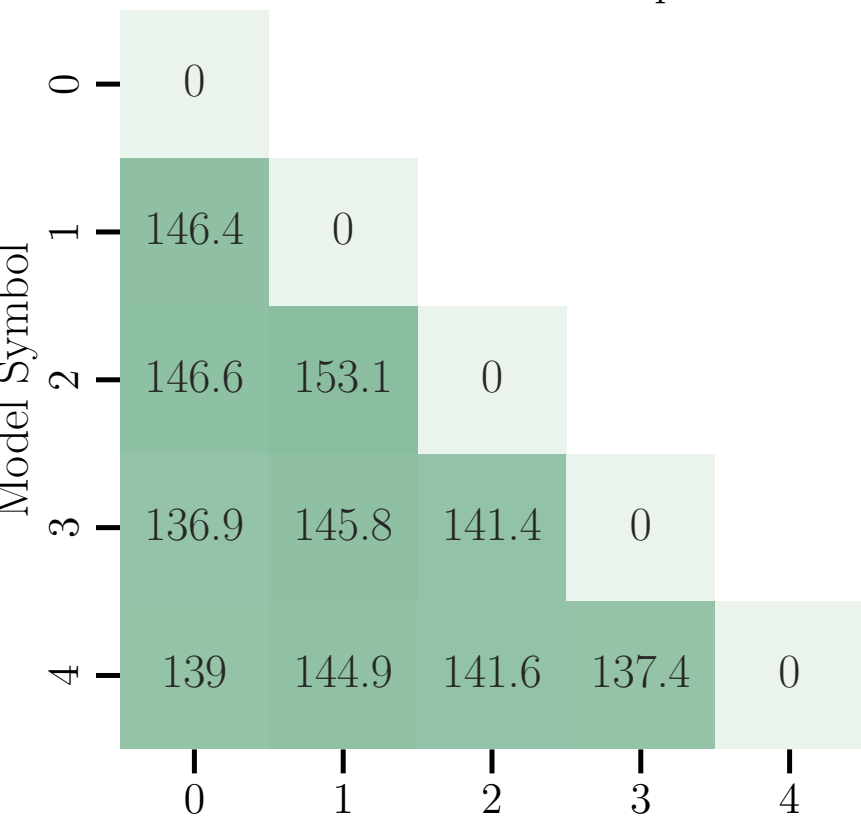

Supplement: supplementary_material [file attachment]

# Cosine Similarity

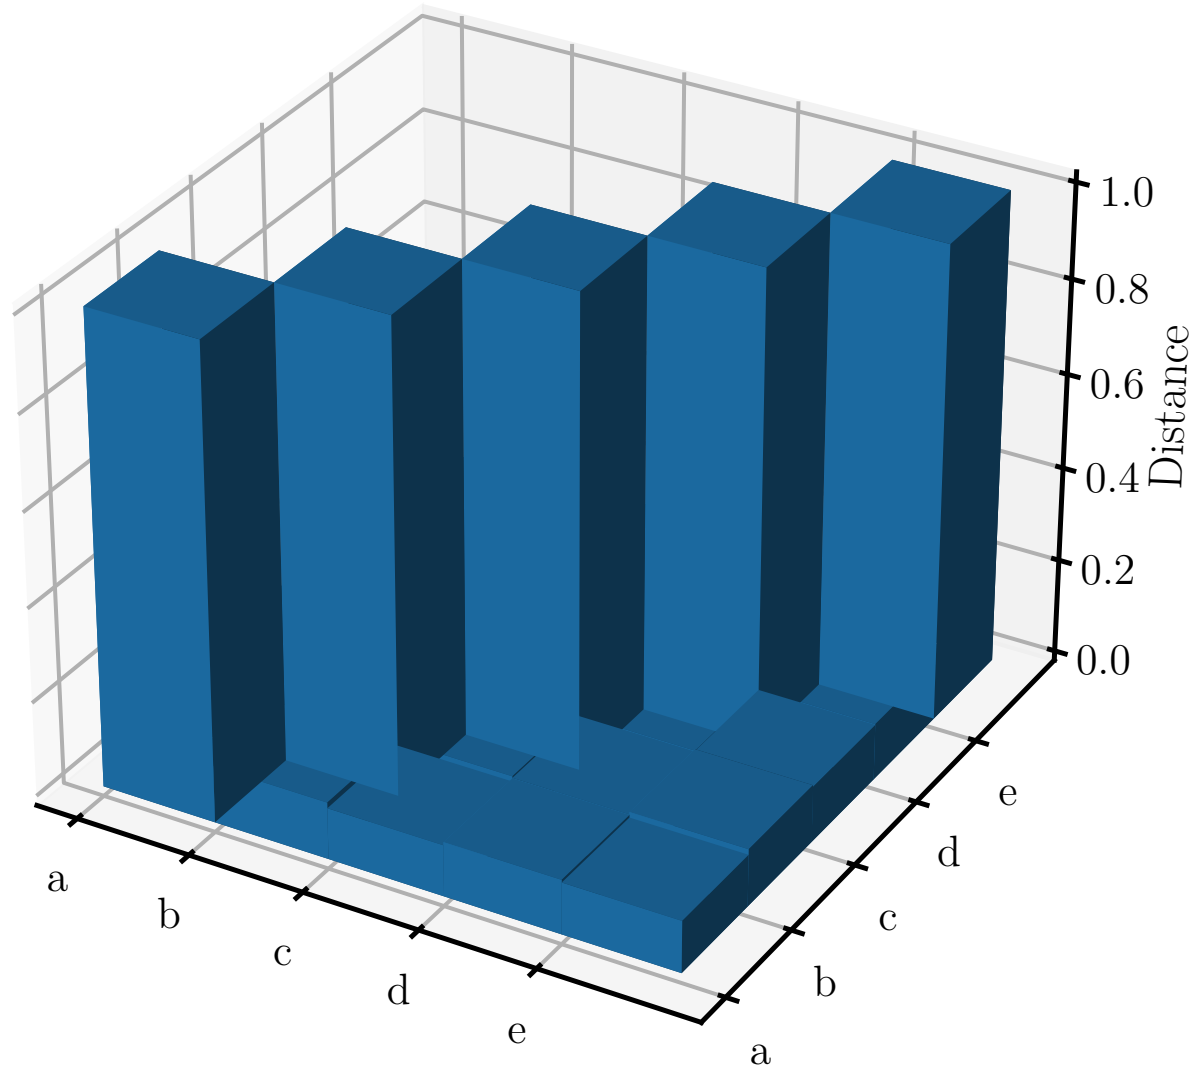

Supplement: supplementary_material [file attachment]

# Centered Kernel Alignment

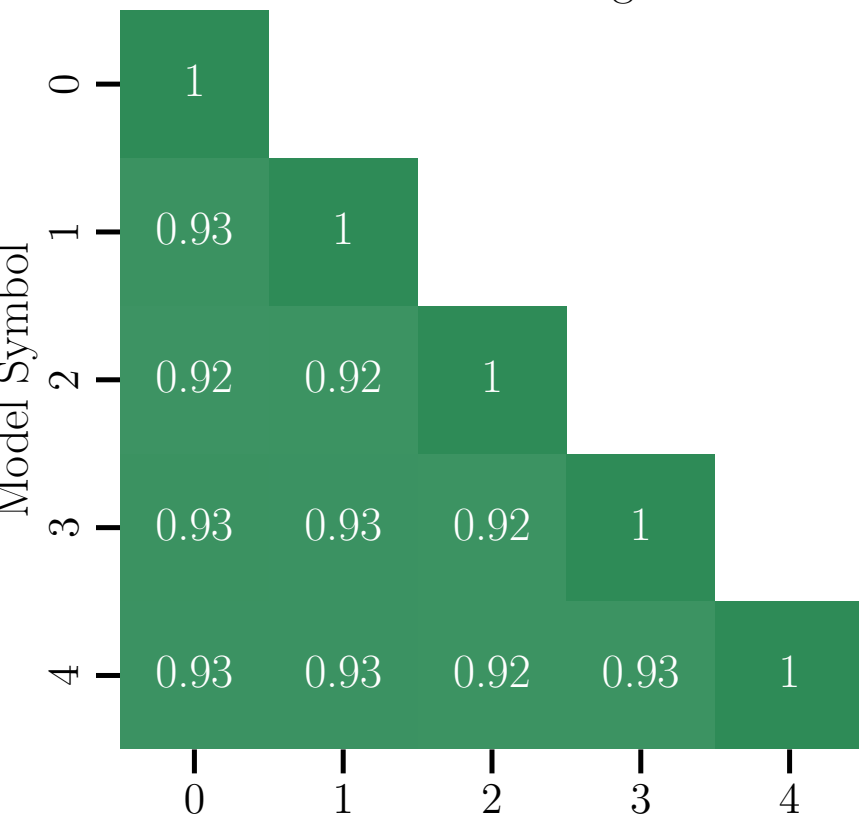

Supplement: supplementary_material [file attachment]

Euclidean distance between representations

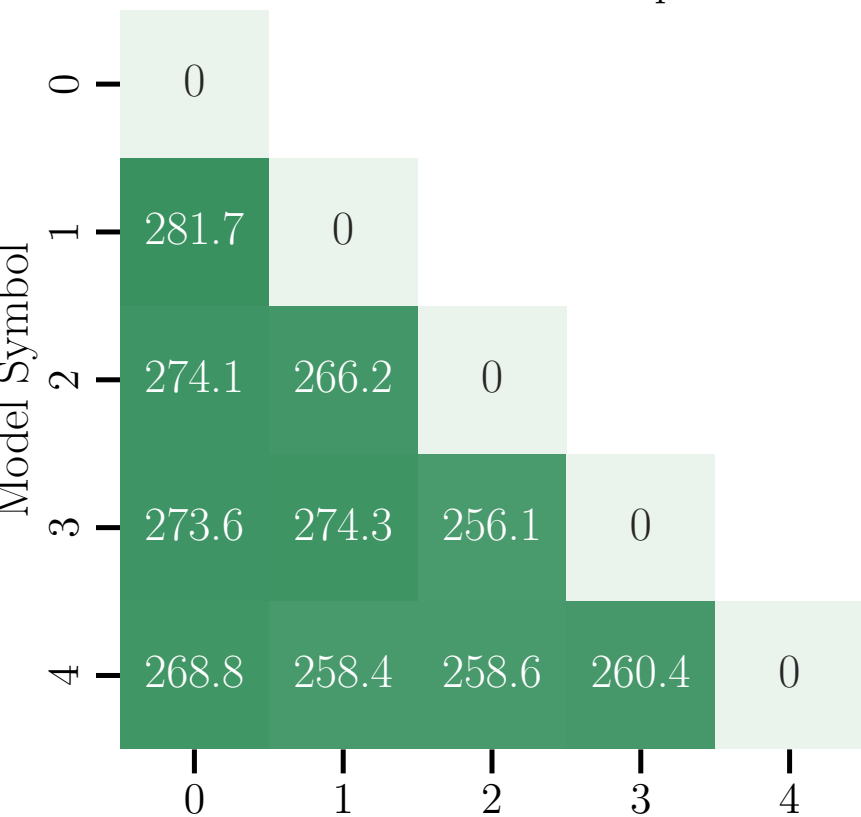

Supplement: supplementary_material [file attachment]

Accuracy

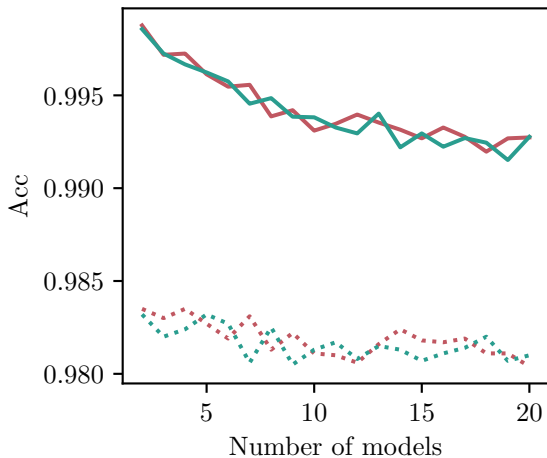

Loss

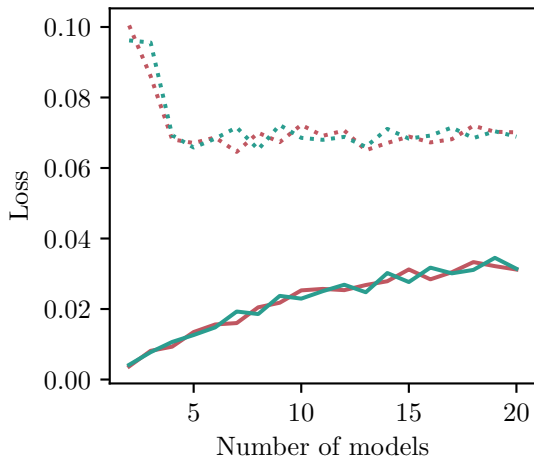

— MergeMany (train)

···· MergeMany (test)

—  $C^2M^3$  (train)····  $C^2M^3$  (test)

Supplement: supplementary_material [file attachment]

Accuracy

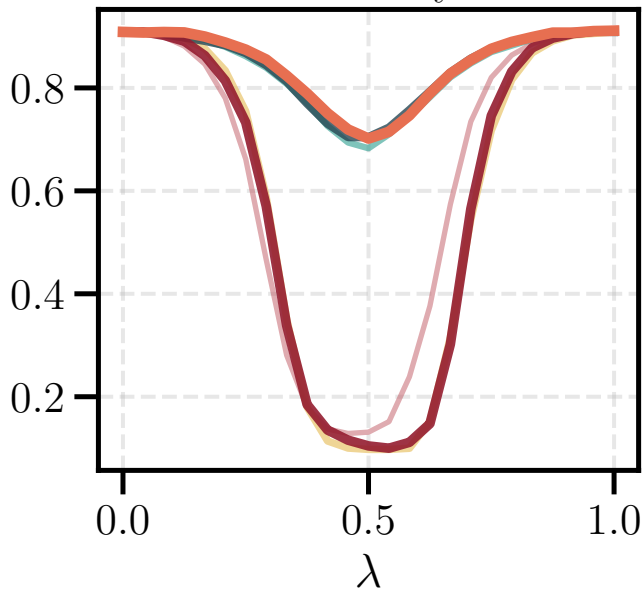

Loss

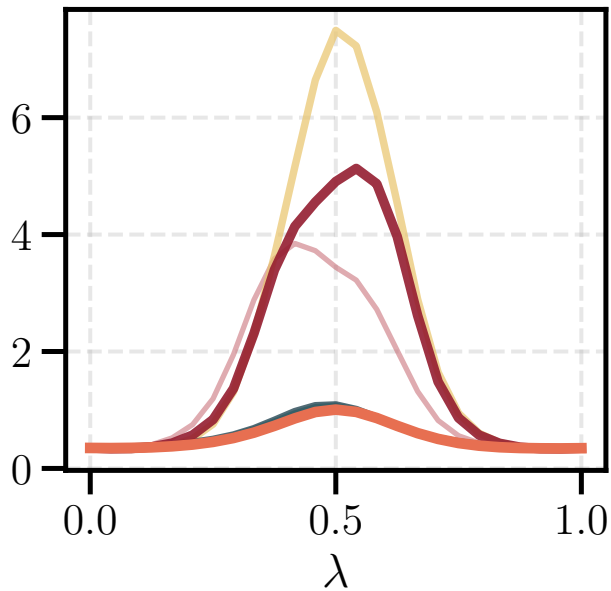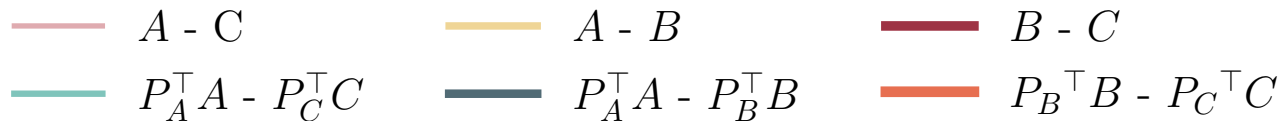

Supplement: supplementary_material [file attachment]

Initialization

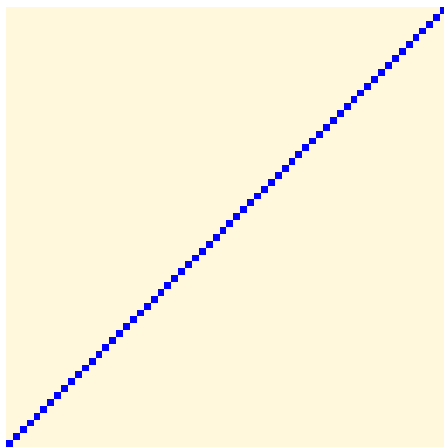

Step 2

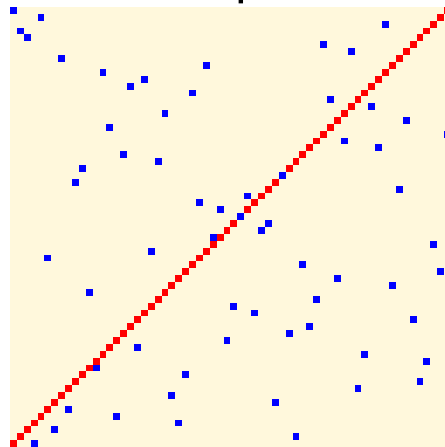

Step 3

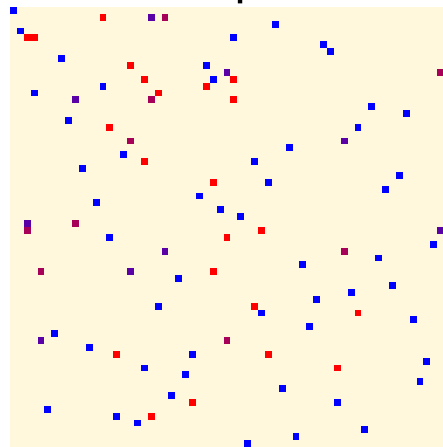

Step 4

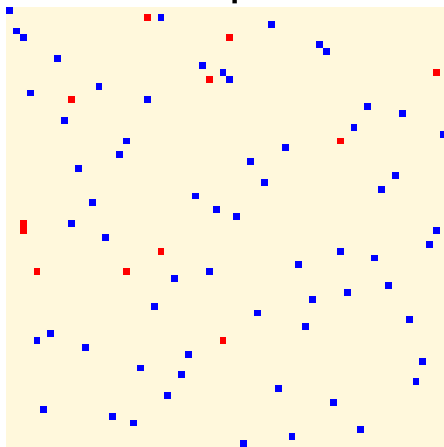

Step 5

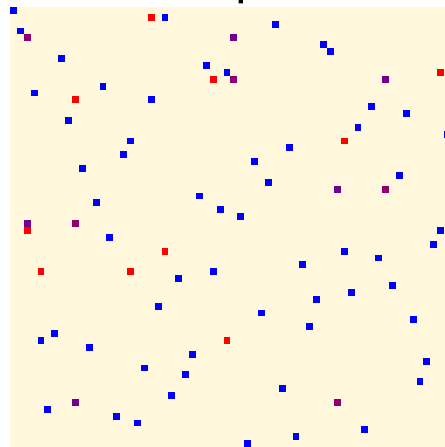

Step 6

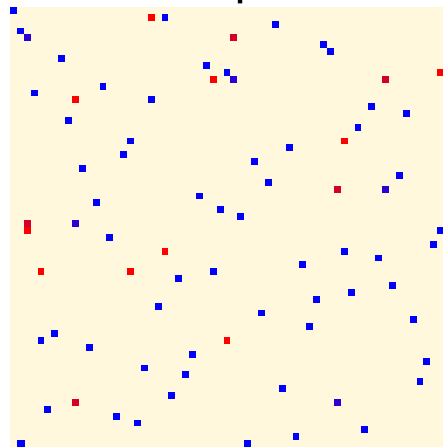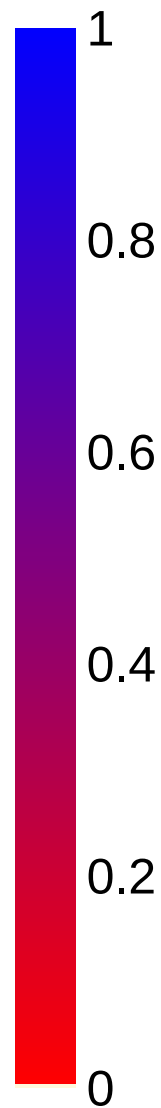

Supplement: supplementary_material [file attachment]

Cosine Similarity

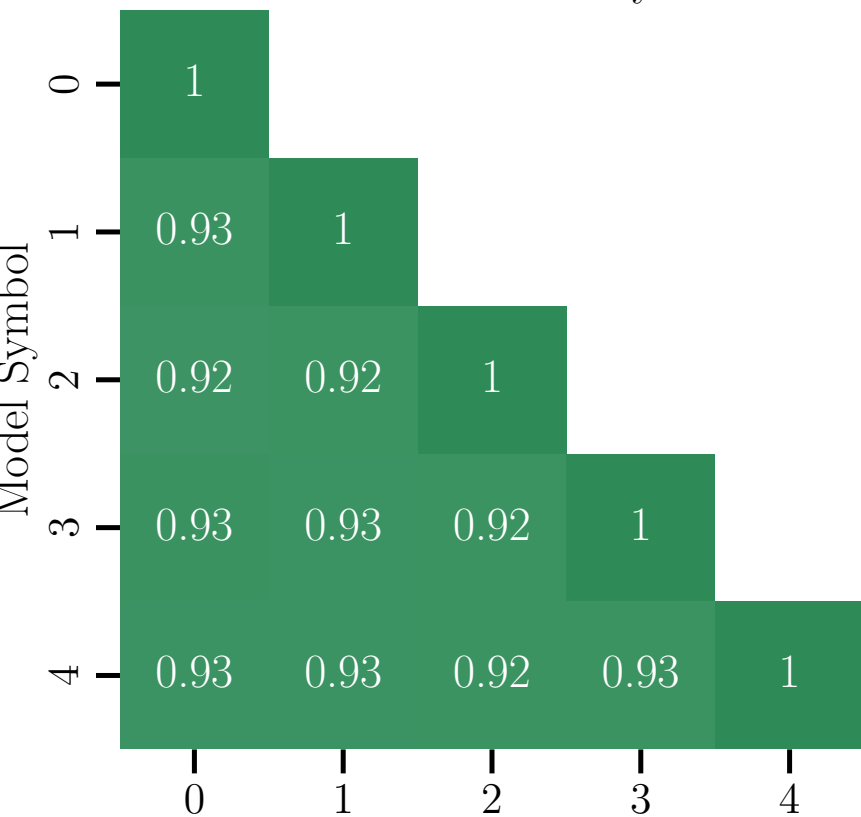

Supplement: supplementary_material [file attachment]

Step size for odd iterations

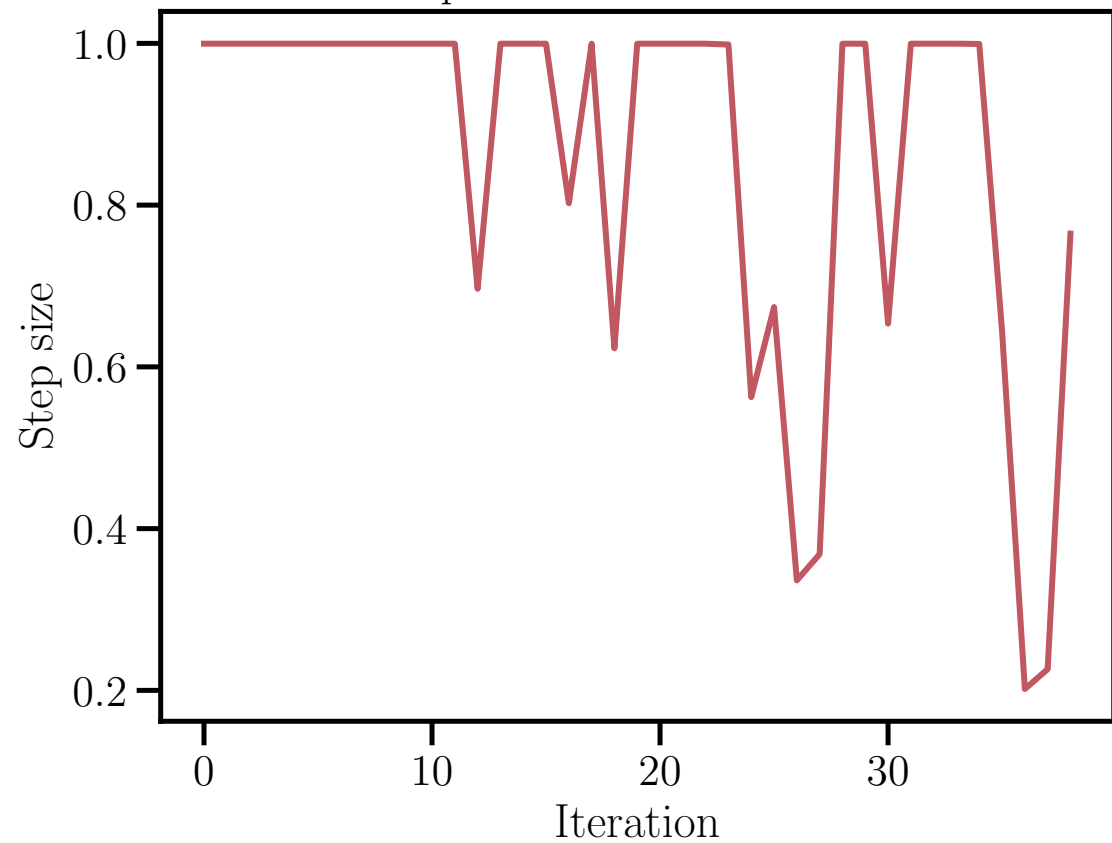

Supplement: supplementary_material [file attachment]

# Cosine Similarity

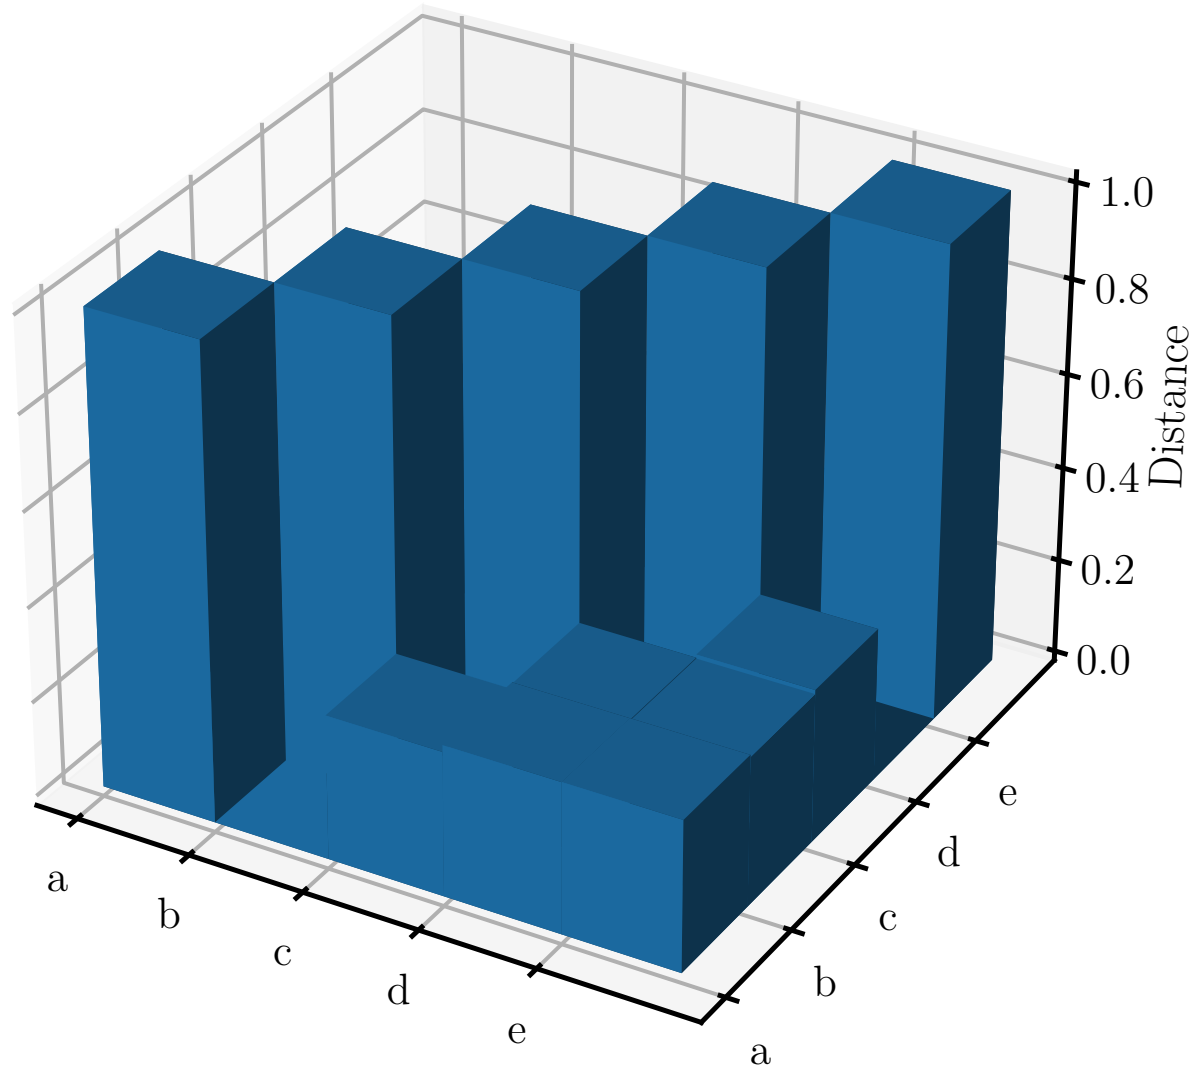

Supplement: supplementary_material [file attachment]

## Euclidean Distance

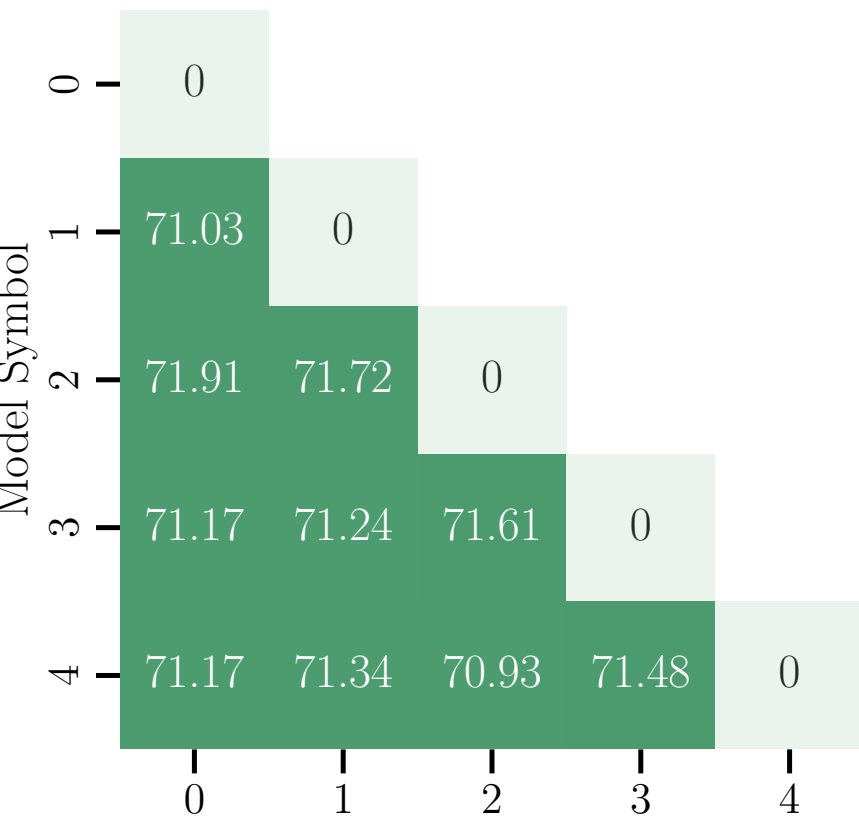

Supplement: supplementary_material [file attachment]

Interpolated models accuracy

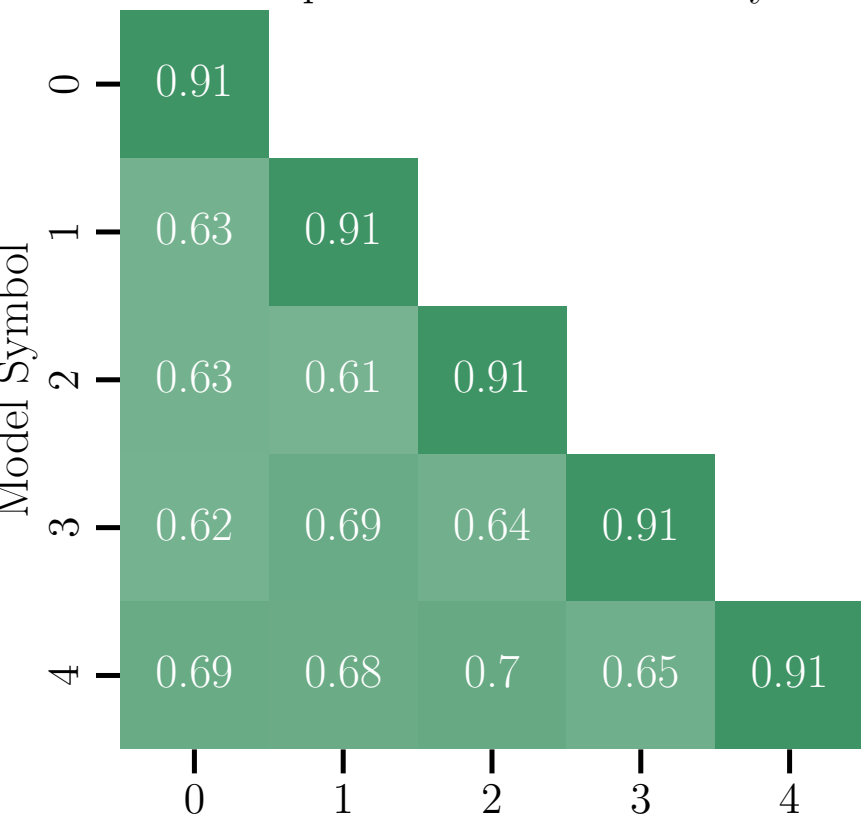

Supplement: supplementary_material [file attachment]

## Centered Kernel Alignment

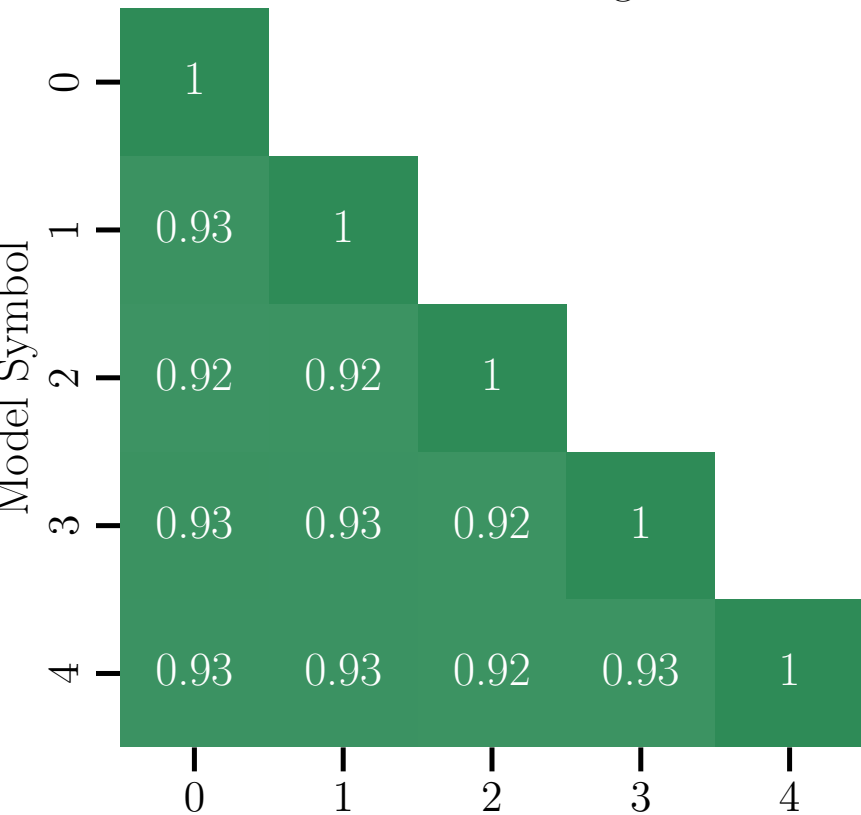

Supplement: supplementary_material [file attachment]
